# Supplementary material
Source: publisher figshare collection journal article supplement (https://tandf.figshare.com/articles/dataset/_/7296392)
Supplement: Supplementary file 1 [file 2]

Archive with 2 entries (2 files):
- taje_a_1520147_sm2288.xlsx
- taje_a_1520147_sm2287.pdf
