# Supplementary material
Source: publisher figshare collection journal article supplement (https://tandf.figshare.com/articles/dataset/_/7296392)
Supplement: Supplementary file 1 [file 2 › taje_a_1520147_sm2288.xlsx]

## Sheet: PlotDat6
Source sheet	ACH1-3B_ACH1_3B	0.3	417.47	1	408.3	13
Plot name	Average6	14.7	417.47	2	410	16
Plot Type	15			3	414.1	13
1st free col	8			4	414.7	13
Sigma Level	2			5	415.7	13
Absolute Errs	TRUE			6	416.2	13
Symbol Type	1			7	416.9	13
Inverse Plot	FALSE			8	416.9	13
Color Plot	TRUE			9	417.3	14
3D plot	FALSE			10	417.7	16
Linear	FALSE			11	421.9	13
Data Range	AA4:AB20			12	424	14
Filled Symbols	FALSE			13	425.9	17
ConcAge	FALSE			14	426.9	13
ConcSwap	FALSE			IsoLine	IsoLine	IsoLine	IsoLine
1st Symbol-row	1

## Sheet: PlotDat7
Source sheet	ACH1-3B_ACH1_3B	0.3	417.888	1	408.3	13
Plot name	Average7	15.7	417.888	2	410	16
Plot Type	15			3	414.1	13
1st free col	8			4	414.7	13
Sigma Level	2			5	415.7	13
Absolute Errs	TRUE			6	416.2	13
Symbol Type	1			7	416.9	13
Inverse Plot	FALSE			8	416.9	13
Color Plot	TRUE			9	417.3	14
3D plot	FALSE			10	417.7	16
Linear	FALSE			11	421.9	13
Data Range	AA4:AB21			12	424	14
Filled Symbols	FALSE			13	425.9	17
ConcAge	FALSE			14	426.9	13
ConcSwap	FALSE			15	428	18
1st Symbol-row	1			IsoLine	IsoLine	IsoLine	IsoLine

## Sheet: PlotDat8
Source sheet	ACH1-3B_ACH1_3B	0	0	380	0	0	0
Plot name	ProbDens8	0.95	0	475	0	1899.05	0
Plot Type	16	1.9	0	475	26
1st free col	9	2.85	0	380	26
Sigma Level	2	3.8	0	380	0
Absolute Errs	TRUE	4.75	0	ErrBox	ErrBox
Symbol Type	1	5.7	0	475	0
Inverse Plot	FALSE	6.65	0	570	0
Color Plot	TRUE	7.6	0	570	4
3D plot	FALSE	8.55	0	475	4
Linear	FALSE	9.5	0	475	0
Data Range	AA2:AB57	10.45	0	ErrBox	ErrBox
Filled Symbols	TRUE	11.4	0	1045	0
ConcAge	FALSE	12.35	0	1140	0
ConcSwap	FALSE	13.3	0	1140	2
1st Symbol-row	1	14.25	0	1045	2
		15.2	0	1045	0
		16.15	0	ErrBox	ErrBox
		17.1	0	1140	0
		18.05	0	1235	0
		19	0	1235	1
		19.95	0	1140	1
		20.9	0	1140	0
		21.85	0	ErrBox	ErrBox
		22.8	0	1710	0
		23.75	0	1805	0
		24.7	0	1805	1
		25.65	0	1710	1
		26.6	0	1710	0
		27.55	0	ErrBox	ErrBox
		28.5	0
		29.45	0
		30.4	0
		31.35	0
		32.3	0
		33.25	0
		34.2	0
		35.15	0
		36.1	0
		37.05	0
		38	0
		38.95	0
		39.9	0
		40.85	0
		41.8	0
		42.75	0
		43.7	0
		44.65	0
		45.6	0
		46.55	0
		47.5	0
		48.45	0
		49.4	0
		50.35	0
		51.3	0
		52.25	0
		53.2	0
		54.15	0
		55.1	0
		56.05	0
		57	0
		57.95	0
		58.9	0
		59.85	0
		60.8	0
		61.75	0
		62.7	0
		63.65	0
		64.6	0
		65.55	0
		66.5	0
		67.45	0
		68.4	0
		69.35	0
		70.3	0
		71.25	0
		72.2	0
		73.15	0
		74.1	0
		75.05	0
		76	0
		76.95	0
		77.9	0
		78.85	0
		79.8	0
		80.75	0
		81.7	0
		82.65	0
		83.6	0
		84.55	0
		85.5	0
		86.45	0
		87.4	0
		88.35	0
		89.3	0
		90.25	0
		91.2	0
		92.15	0
		93.1	0
		94.05	0
		95	0
		95.95	0
		96.9	0
		97.85	0
		98.8	0
		99.75	0
		100.7	0
		101.65	0
		102.6	0
		103.55	0
		104.5	0
		105.45	0
		106.4	0
		107.35	0
		108.3	0
		109.25	0
		110.2	0
		111.15	0
		112.1	0
		113.05	0
		114	0
		114.95	0
		115.9	0
		116.85	0
		117.8	0
		118.75	0
		119.7	0
		120.65	0
		121.6	0
		122.55	0
		123.5	0
		124.45	0
		125.4	0
		126.35	0
		127.3	0
		128.25	0
		129.2	0
		130.15	0
		131.1	0
		132.05	0
		133	0
		133.95	0
		134.9	0
		135.85	0
		136.8	0
		137.75	0
		138.7	0
		139.65	0
		140.6	0
		141.55	0
		142.5	0
		143.45	0
		144.4	0
		145.35	0
		146.3	0
		147.25	0
		148.2	0
		149.15	0
		150.1	0
		151.05	0
		152	0
		152.95	0
		153.9	0
		154.85	0
		155.8	0
		156.75	0
		157.7	0
		158.65	0
		159.6	0
		160.55	0
		161.5	0
		162.45	0
		163.4	0
		164.35	0
		165.3	0
		166.25	0
		167.2	0
		168.15	0
		169.1	0
		170.05	0
		171	0
		171.95	0
		172.9	0
		173.85	0
		174.8	0
		175.75	0
		176.7	0
		177.65	0
		178.6	0
		179.55	0
		180.5	0
		181.45	0
		182.4	0
		183.35	0
		184.3	0
		185.25	0
		186.2	0
		187.15	0
		188.1	0
		189.05	0
		190	0
		190.95	0
		191.9	0
		192.85	0
		193.8	0
		194.75	0
		195.7	0
		196.65	0
		197.6	0
		198.55	0
		199.5	0
		200.45	0
		201.4	0
		202.35	0
		203.3	0
		204.25	0
		205.2	0
		206.15	0
		207.1	0
		208.05	0
		209	0
		209.95	0
		210.9	0
		211.85	0
		212.8	0
		213.75	0
		214.7	0
		215.65	0
		216.6	0
		217.55	0
		218.5	0
		219.45	0
		220.4	0
		221.35	0
		222.3	0
		223.25	0
		224.2	0
		225.15	0
		226.1	0
		227.05	0
		228	0
		228.95	0
		229.9	0
		230.85	0
		231.8	0
		232.75	0
		233.7	0
		234.65	0
		235.6	0
		236.55	0
		237.5	0
		238.45	0
		239.4	0
		240.35	0
		241.3	0
		242.25	0
		243.2	0
		244.15	0
		245.1	0
		246.05	0
		247	0
		247.95	0
		248.9	0
		249.85	0
		250.8	0
		251.75	0
		252.7	0
		253.65	0
		254.6	0
		255.55	0
		256.5	0
		257.45	0
		258.4	0
		259.35	0
		260.3	0
		261.25	0
		262.2	0
		263.15	0
		264.1	0
		265.05	0
		266	0
		266.95	0
		267.9	0
		268.85	0
		269.8	0
		270.75	0
		271.7	0
		272.65	0
		273.6	0
		274.55	0
		275.5	0
		276.45	0
		277.4	0
		278.35	0
		279.3	0
		280.25	0
		281.2	0
		282.15	0
		283.1	0
		284.05	0
		285	0
		285.95	0
		286.9	0
		287.85	0
		288.8	0
		289.75	0
		290.7	0
		291.65	0
		292.6	0
		293.55	0
		294.5	0
		295.45	0
		296.4	0
		297.35	0
		298.3	0
		299.25	0
		300.2	0
		301.15	0
		302.1	0
		303.05	0
		304	0
		304.95	0
		305.9	0
		306.85	0
		307.8	0
		308.75	0
		309.7	0
		310.65	0
		311.6	0
		312.55	0
		313.5	0
		314.45	0
		315.4	0
		316.35	0
		317.3	0
		318.25	0
		319.2	0
		320.15	0
		321.1	0
		322.05	0
		323	0
		323.95	0
		324.9	0
		325.85	0
		326.8	0
		327.75	0
		328.7	0
		329.65	0
		330.6	0
		331.55	0
		332.5	0
		333.45	0
		334.4	0
		335.35	0
		336.3	0
		337.25	0
		338.2	0
		339.15	0
		340.1	0
		341.05	0
		342	0
		342.95	0
		343.9	0
		344.85	0
		345.8	0
		346.75	0
		347.7	0
		348.65	0
		349.6	0
		350.55	0
		351.5	0
		352.45	0
		353.4	0
		354.35	0
		355.3	0
		356.25	0
		357.2	0
		358.15	0
		359.1	0
		360.05	0
		361	0
		361.95	0
		362.9	0
		363.85	0
		364.8	0
		365.75	0
		366.7	0
		367.65	0
		368.6	0
		369.55	0
		370.5	0
		371.45	0
		372.4	0
		373.35	4.0634e-08
		374.3	6.95174e-08
		375.25	1.17266e-07
		376.2	1.95043e-07
		377.15	3.19861e-07
		378.1	5.54281e-07
		379.05	8.9694e-07
		380	1.43444e-06
		380.95	2.3059e-06
		381.9	3.60911e-06
		382.85	5.58496e-06
		383.8	8.57917e-06
		384.75	1.30694e-05
		385.7	1.96723e-05
		386.65	2.93467e-05
		387.6	4.31419e-05
		388.55	6.27327e-05
		389.5	9.0216e-05
		390.45	0.000128292
		391.4	0.000180485
		392.35	0.000250897
		393.3	0.000344803
		394.25	0.00046832
		395.2	0.000628681
		396.15	0.000834115
		397.1	0.00109384
		398.05	0.00141775
		399	0.00181633
		399.95	0.00230015
		400.9	0.00287938
		401.85	0.00356307
		402.8	0.00435838
		403.75	0.00526948
		404.7	0.00629664
		405.65	0.00743508
		406.6	0.00867409
		407.55	0.00999644
		408.5	0.011378
		409.45	0.0127881
		410.4	0.014191
		411.35	0.0155469
		412.3	0.0168147
		413.25	0.0179549
		414.2	0.0189319
		415.15	0.0197175
		416.1	0.0202924
		417.05	0.0206478
		418	0.020786
		418.95	0.0207197
		419.9	0.0204704
		420.85	0.0200664
		421.8	0.0195405
		422.75	0.0189269
		423.7	0.0182599
		424.65	0.0175711
		425.6	0.0168889
		426.55	0.0162373
		427.5	0.0156356
		428.45	0.0150984
		429.4	0.0146357
		430.35	0.0142527
		431.3	0.0139504
		432.25	0.0137254
		433.2	0.0135699
		434.15	0.0134726
		435.1	0.013419
		436.05	0.0133922
		437	0.0133739
		437.95	0.0133458
		438.9	0.0132911
		439.85	0.0131949
		440.8	0.0130462
		441.75	0.0128374
		442.7	0.0125654
		443.65	0.0122309
		444.6	0.011838
		445.55	0.0113933
		446.5	0.010905
		447.45	0.0103821
		448.4	0.00983333
		449.35	0.00926674
		450.3	0.00868925
		451.25	0.00810674
		452.2	0.00752391
		453.15	0.00694463
		454.1	0.00637234
		455.05	0.00581012
		456	0.0052612
		456.95	0.00472882
		457.9	0.00421653
		458.85	0.00372796
		459.8	0.0032667
		460.75	0.00283613
		461.7	0.00243924
		462.65	0.00207841
		463.6	0.00175532
		464.55	0.00147074
		465.5	0.00122467
		466.45	0.00101641
		467.4	0.000844419
		468.35	0.000706738
		469.3	0.000600898
		470.25	0.000524171
		471.2	0.000473809
		472.15	0.000446967
		473.1	0.000440896
		474.05	0.000452901
		475	0.000480554
		475.95	0.000521479
		476.9	0.000573415
		477.85	0.000634401
		478.8	0.000702337
		479.75	0.000775313
		480.7	0.000851359
		481.65	0.000928736
		482.6	0.00100563
		483.55	0.00108039
		484.5	0.00115149
		485.45	0.00121757
		486.4	0.00127753
		487.35	0.0013305
		488.3	0.00137591
		489.25	0.00141354
		490.2	0.00144349
		491.15	0.00146608
		492.1	0.00148203
		493.05	0.00149219
		494	0.00149762
		494.95	0.00149945
		495.9	0.00149888
		496.85	0.00149706
		497.8	0.00149494
		498.75	0.00149339
		499.7	0.00149303
		500.65	0.00149428
		501.6	0.00149729
		502.55	0.00150201
		503.5	0.00150819
		504.45	0.00151544
		505.4	0.00152326
		506.35	0.00153114
		507.3	0.00153855
		508.25	0.00154506
		509.2	0.00155031
		510.15	0.00155411
		511.1	0.0015564
		512.05	0.00155726
		513	0.00155692
		513.95	0.00155571
		514.9	0.00155406
		515.85	0.00155241
		516.8	0.00155121
		517.75	0.00155089
		518.7	0.00155179
		519.65	0.00155417
		520.6	0.00155817
		521.55	0.00156381
		522.5	0.00157101
		523.45	0.00157958
		524.4	0.00158925
		525.35	0.00159968
		526.3	0.0016105
		527.25	0.00162129
		528.2	0.00163168
		529.15	0.00164127
		530.1	0.00164971
		531.05	0.00165665
		532	0.0016618
		532.95	0.00166486
		533.9	0.00166554
		534.85	0.00166361
		535.8	0.00165877
		536.75	0.00165073
		537.7	0.0016392
		538.65	0.00162388
		539.6	0.00160446
		540.55	0.00158067
		541.5	0.00155223
		542.45	0.00151894
		543.4	0.00148068
		544.35	0.00143737
		545.3	0.00138909
		546.25	0.00133599
		547.2	0.00127837
		548.15	0.00121665
		549.1	0.00115134
		550.05	0.00108308
		551	0.00101259
		551.95	0.000940651
		552.9	0.000868067
		553.85	0.000795664
		554.8	0.00072422
		555.75	0.000654559
		556.7	0.000587334
		557.65	0.000523153
		558.6	0.000462524
		559.55	0.000405846
		560.5	0.000353408
		561.45	0.000305385
		562.4	0.000261847
		563.35	0.000222768
		564.3	0.000188037
		565.25	0.00015747
		566.2	0.000130829
		567.15	0.000107832
		568.1	8.8169e-05
		569.05	7.15151e-05
		570	5.75419e-05
		570.95	4.59269e-05
		571.9	3.63614e-05
		572.85	2.8556e-05
		573.8	2.22451e-05
		574.75	1.71888e-05
		575.7	1.31742e-05
		576.65	9.9942e-06
		577.6	7.53848e-06
		578.55	5.63981e-06
		579.5	4.18495e-06
		580.45	3.08007e-06
		581.4	2.24841e-06
		582.35	1.62793e-06
		583.3	1.16907e-06
		584.25	8.32706e-07
		585.2	5.88283e-07
		586.15	4.12217e-07
		587.1	2.86491e-07
		588.05	1.97488e-07
		589	1.35025e-07
		589.95	9.15661e-08
		590.9	6.15884e-08
		591.85	4.10874e-08
		592.8	0
		593.75	0
		594.7	0
		595.65	0
		596.6	0
		597.55	0
		598.5	0
		599.45	0
		600.4	0
		601.35	0
		602.3	0
		603.25	0
		604.2	0
		605.15	0
		606.1	0
		607.05	0
		608	0
		608.95	0
		609.9	0
		610.85	0
		611.8	0
		612.75	0
		613.7	0
		614.65	0
		615.6	0
		616.55	0
		617.5	0
		618.45	0
		619.4	0
		620.35	0
		621.3	0
		622.25	0
		623.2	0
		624.15	0
		625.1	0
		626.05	0
		627	0
		627.95	0
		628.9	0
		629.85	0
		630.8	0
		631.75	0
		632.7	0
		633.65	0
		634.6	0
		635.55	0
		636.5	0
		637.45	0
		638.4	0
		639.35	0
		640.3	0
		641.25	0
		642.2	0
		643.15	0
		644.1	0
		645.05	0
		646	0
		646.95	0
		647.9	0
		648.85	0
		649.8	0
		650.75	0
		651.7	0
		652.65	0
		653.6	0
		654.55	0
		655.5	0
		656.45	0
		657.4	0
		658.35	0
		659.3	0
		660.25	0
		661.2	0
		662.15	0
		663.1	0
		664.05	0
		665	0
		665.95	0
		666.9	0
		667.85	0
		668.8	0
		669.75	0
		670.7	0
		671.65	0
		672.6	0
		673.55	0
		674.5	0
		675.45	0
		676.4	0
		677.35	0
		678.3	0
		679.25	0
		680.2	0
		681.15	0
		682.1	0
		683.05	0
		684	0
		684.95	0
		685.9	0
		686.85	0
		687.8	0
		688.75	0
		689.7	0
		690.65	0
		691.6	0
		692.55	0
		693.5	0
		694.45	0
		695.4	0
		696.35	0
		697.3	0
		698.25	0
		699.2	0
		700.15	0
		701.1	0
		702.05	0
		703	0
		703.95	0
		704.9	0
		705.85	0
		706.8	0
		707.75	0
		708.7	0
		709.65	0
		710.6	0
		711.55	0
		712.5	0
		713.45	0
		714.4	0
		715.35	0
		716.3	0
		717.25	0
		718.2	0
		719.15	0
		720.1	0
		721.05	0
		722	0
		722.95	0
		723.9	0
		724.85	0
		725.8	0
		726.75	0
		727.7	0
		728.65	0
		729.6	0
		730.55	0
		731.5	0
		732.45	0
		733.4	0
		734.35	0
		735.3	0
		736.25	0
		737.2	0
		738.15	0
		739.1	0
		740.05	0
		741	0
		741.95	0
		742.9	0
		743.85	0
		744.8	0
		745.75	0
		746.7	0
		747.65	0
		748.6	0
		749.55	0
		750.5	0
		751.45	0
		752.4	0
		753.35	0
		754.3	0
		755.25	0
		756.2	0
		757.15	0
		758.1	0
		759.05	0
		760	0
		760.95	0
		761.9	0
		762.85	0
		763.8	0
		764.75	0
		765.7	0
		766.65	0
		767.6	0
		768.55	0
		769.5	0
		770.45	0
		771.4	0
		772.35	0
		773.3	0
		774.25	0
		775.2	0
		776.15	0
		777.1	0
		778.05	0
		779	0
		779.95	0
		780.9	0
		781.85	0
		782.8	0
		783.75	0
		784.7	0
		785.65	0
		786.6	0
		787.55	0
		788.5	0
		789.45	0
		790.4	0
		791.35	0
		792.3	0
		793.25	0
		794.2	0
		795.15	0
		796.1	0
		797.05	0
		798	0
		798.95	0
		799.9	0
		800.85	0
		801.8	0
		802.75	0
		803.7	0
		804.65	0
		805.6	0
		806.55	0
		807.5	0
		808.45	0
		809.4	0
		810.35	0
		811.3	0
		812.25	0
		813.2	0
		814.15	0
		815.1	0
		816.05	0
		817	0
		817.95	0
		818.9	0
		819.85	0
		820.8	0
		821.75	0
		822.7	0
		823.65	0
		824.6	0
		825.55	0
		826.5	0
		827.45	0
		828.4	0
		829.35	0
		830.3	0
		831.25	0
		832.2	0
		833.15	0
		834.1	0
		835.05	0
		836	0
		836.95	0
		837.9	0
		838.85	0
		839.8	0
		840.75	0
		841.7	0
		842.65	0
		843.6	0
		844.55	0
		845.5	0
		846.45	0
		847.4	0
		848.35	0
		849.3	0
		850.25	0
		851.2	0
		852.15	0
		853.1	0
		854.05	0
		855	0
		855.95	0
		856.9	0
		857.85	0
		858.8	0
		859.75	0
		860.7	0
		861.65	0
		862.6	0
		863.55	0
		864.5	0
		865.45	0
		866.4	0
		867.35	0
		868.3	0
		869.25	0
		870.2	0
		871.15	0
		872.1	0
		873.05	0
		874	0
		874.95	0
		875.9	0
		876.85	0
		877.8	0
		878.75	0
		879.7	0
		880.65	0
		881.6	0
		882.55	0
		883.5	0
		884.45	0
		885.4	0
		886.35	0
		887.3	0
		888.25	0
		889.2	0
		890.15	0
		891.1	0
		892.05	0
		893	0
		893.95	0
		894.9	0
		895.85	0
		896.8	0
		897.75	0
		898.7	0
		899.65	0
		900.6	0
		901.55	0
		902.5	0
		903.45	0
		904.4	0
		905.35	0
		906.3	0
		907.25	0
		908.2	0
		909.15	0
		910.1	0
		911.05	0
		912	0
		912.95	0
		913.9	0
		914.85	0
		915.8	0
		916.75	0
		917.7	0
		918.65	0
		919.6	0
		920.55	0
		921.5	0
		922.45	0
		923.4	0
		924.35	0
		925.3	0
		926.25	0
		927.2	0
		928.15	0
		929.1	0
		930.05	0
		931	0
		931.95	0
		932.9	0
		933.85	0
		934.8	0
		935.75	0
		936.7	0
		937.65	0
		938.6	0
		939.55	0
		940.5	0
		941.45	0
		942.4	0
		943.35	0
		944.3	0
		945.25	0
		946.2	0
		947.15	0
		948.1	0
		949.05	0
		950	0
		950.95	0
		951.9	0
		952.85	0
		953.8	0
		954.75	0
		955.7	0
		956.65	0
		957.6	0
		958.55	0
		959.5	0
		960.45	0
		961.4	0
		962.35	0
		963.3	0
		964.25	0
		965.2	0
		966.15	0
		967.1	0
		968.05	0
		969	0
		969.95	0
		970.9	0
		971.85	0
		972.8	0
		973.75	0
		974.7	0
		975.65	0
		976.6	0
		977.55	0
		978.5	0
		979.45	0
		980.4	0
		981.35	0
		982.3	0
		983.25	0
		984.2	0
		985.15	0
		986.1	0
		987.05	0
		988	0
		988.95	0
		989.9	0
		990.85	0
		991.8	0
		992.75	0
		993.7	0
		994.65	0
		995.6	0
		996.55	0
		997.5	0
		998.45	0
		999.4	0
		1000.35	0
		1001.3	0
		1002.25	0
		1003.2	0
		1004.15	0
		1005.1	0
		1006.05	2.97287e-08
		1007	3.66803e-08
		1007.95	4.51555e-08
		1008.9	5.54636e-08
		1009.85	6.79714e-08
		1010.8	8.3112e-08
		1011.75	1.01396e-07
		1012.7	1.23424e-07
		1013.65	1.49899e-07
		1014.6	1.81642e-07
		1015.55	2.19612e-07
		1016.5	2.99842e-07
		1017.45	3.63912e-07
		1018.4	4.40848e-07
		1019.35	5.33051e-07
		1020.3	6.43336e-07
		1021.25	7.74989e-07
		1022.2	9.3184e-07
		1023.15	1.11834e-06
		1024.1	1.33965e-06
		1025.05	1.60173e-06
		1026	1.91146e-06
		1026.95	2.27675e-06
		1027.9	2.70667e-06
		1028.85	3.21159e-06
		1029.8	3.80332e-06
		1030.75	4.49527e-06
		1031.7	5.30266e-06
		1032.65	6.24264e-06
		1033.6	7.33449e-06
		1034.55	8.59984e-06
		1035.5	1.00628e-05
		1036.45	1.17504e-05
		1037.4	1.36921e-05
		1038.35	1.5921e-05
		1039.3	1.8473e-05
		1040.25	2.13876e-05
		1041.2	2.47077e-05
		1042.15	2.84799e-05
		1043.1	3.27542e-05
		1044.05	3.75844e-05
		1045	4.30277e-05
		1045.95	4.91447e-05
		1046.9	5.59994e-05
		1047.85	6.36583e-05
		1048.8	7.21907e-05
		1049.75	8.16679e-05
		1050.7	9.21624e-05
		1051.65	0.000103748
		1052.6	0.000116497
		1053.55	0.000130482
		1054.5	0.000145773
		1055.45	0.000162438
		1056.4	0.000180538
		1057.35	0.000200131
		1058.3	0.000221265
		1059.25	0.000243983
		1060.2	0.000268315
		1061.15	0.00029428
		1062.1	0.000321885
		1063.05	0.000351121
		1064	0.000381996
		1064.95	0.000414414
		1065.9	0.000448342
		1066.85	0.000483703
		1067.8	0.000520399
		1068.75	0.000558314
		1069.7	0.000597312
		1070.65	0.000637237
		1071.6	0.000677912
		1072.55	0.000719146
		1073.5	0.000760725
		1074.45	0.000802426
		1075.4	0.000844006
		1076.35	0.000885215
		1077.3	0.000925792
		1078.25	0.000965472
		1079.2	0.00100398
		1080.15	0.00104106
		1081.1	0.00107643
		1082.05	0.00110983
		1083	0.00114102
		1083.95	0.00116977
		1084.9	0.00119584
		1085.85	0.00121905
		1086.8	0.00123921
		1087.75	0.00125617
		1088.7	0.00126982
		1089.65	0.00128004
		1090.6	0.00128678
		1091.55	0.00129
		1092.5	0.0012897
		1093.45	0.00128591
		1094.4	0.00127869
		1095.35	0.00126813
		1096.3	0.00125435
		1097.25	0.0012375
		1098.2	0.00121775
		1099.15	0.0011953
		1100.1	0.00117036
		1101.05	0.00114316
		1102	0.00111395
		1102.95	0.00108299
		1103.9	0.00105054
		1104.85	0.00101687
		1105.8	0.000982252
		1106.75	0.000946955
		1107.7	0.000911245
		1108.65	0.000875378
		1109.6	0.000839604
		1110.55	0.000804158
		1111.5	0.000769266
		1112.45	0.000735136
		1113.4	0.00070196
		1114.35	0.000669915
		1115.3	0.000639159
		1116.25	0.000609831
		1117.2	0.000582053
		1118.15	0.000555927
		1119.1	0.000531538
		1120.05	0.000508953
		1121	0.000488221
		1121.95	0.000469376
		1122.9	0.000452435
		1123.85	0.000437401
		1124.8	0.000424262
		1125.75	0.000412993
		1126.7	0.000403558
		1127.65	0.00039591
		1128.6	0.000389992
		1129.55	0.000385736
		1130.5	0.000383068
		1131.45	0.000381906
		1132.4	0.000382163
		1133.35	0.000383743
		1134.3	0.00038655
		1135.25	0.00039048
		1136.2	0.000395428
		1137.15	0.000401285
		1138.1	0.000407943
		1139.05	0.00041529
		1140	0.000423213
		1140.95	0.000431602
		1141.9	0.000440346
		1142.85	0.000449335
		1143.8	0.00045846
		1144.75	0.000467615
		1145.7	0.000476699
		1146.65	0.000485611
		1147.6	0.000494255
		1148.55	0.000502541
		1149.5	0.00051038
		1150.45	0.000517693
		1151.4	0.000524402
		1152.35	0.000530438
		1153.3	0.000535738
		1154.25	0.000540244
		1155.2	0.000543907
		1156.15	0.000546683
		1157.1	0.000548537
		1158.05	0.00054944
		1159	0.000549371
		1159.95	0.000548316
		1160.9	0.000546269
		1161.85	0.000543231
		1162.8	0.00053921
		1163.75	0.00053422
		1164.7	0.000528257
		1165.65	0.000521405
		1166.6	0.000513665
		1167.55	0.000505074
		1168.5	0.000495678
		1169.45	0.000485523
		1170.4	0.000474662
		1171.35	0.000463151
		1172.3	0.000451046
		1173.25	0.000438409
		1174.2	0.000425301
		1175.15	0.000411786
		1176.1	0.000397928
		1177.05	0.000383789
		1178	0.000369434
		1178.95	0.000354924
		1179.9	0.000340322
		1180.85	0.000325685
		1181.8	0.000311072
		1182.75	0.000296536
		1183.7	0.000282128
		1184.65	0.000267873
		1185.6	0.000253869
		1186.55	0.000240129
		1187.5	0.000226689
		1188.45	0.000213584
		1189.4	0.000200845
		1190.35	0.000188496
		1191.3	0.000176562
		1192.25	0.000165061
		1193.2	0.000154008
		1194.15	0.000143415
		1195.1	0.00013329
		1196.05	0.000123638
		1197	0.000114461
		1197.95	0.000105759
		1198.9	9.75281e-05
		1199.85	8.97622e-05
		1200.8	8.24534e-05
		1201.75	7.55921e-05
		1202.7	6.91665e-05
		1203.65	6.31637e-05
		1204.6	5.75694e-05
		1205.55	5.23682e-05
		1206.5	4.7544e-05
		1207.45	4.308e-05
		1208.4	3.8959e-05
		1209.35	3.51635e-05
		1210.3	3.16758e-05
		1211.25	2.84785e-05
		1212.2	2.55539e-05
		1213.15	2.28849e-05
		1214.1	2.04548e-05
		1215.05	1.8247e-05
		1216	1.62458e-05
		1216.95	1.44358e-05
		1217.9	1.28025e-05
		1218.85	1.13318e-05
		1219.8	1.00105e-05
		1220.75	8.82602e-06
		1221.7	7.76652e-06
		1222.65	6.82087e-06
		1223.6	5.97868e-06
		1224.55	5.23025e-06
		1225.5	4.56659e-06
		1226.45	3.97937e-06
		1227.4	3.46089e-06
		1228.35	3.00409e-06
		1229.3	2.6025e-06
		1230.25	2.2502e-06
		1231.2	1.9418e-06
		1232.15	1.67239e-06
		1233.1	1.43755e-06
		1234.05	1.23328e-06
		1235	1.05597e-06
		1235.95	9.02392e-07
		1236.9	7.69644e-07
		1237.85	6.55143e-07
		1238.8	5.56589e-07
		1239.75	4.71939e-07
		1240.7	3.99382e-07
		1241.65	3.37321e-07
		1242.6	2.84348e-07
		1243.55	2.39227e-07
		1244.5	2.00873e-07
		1245.45	1.68339e-07
		1246.4	1.40799e-07
		1247.35	1.17535e-07
		1248.3	9.79234e-08
		1249.25	8.14251e-08
		1250.2	6.75744e-08
		1251.15	5.59703e-08
		1252.1	4.62685e-08
		1253.05	3.81738e-08
		1254	3.14338e-08
		1254.95	0
		1255.9	0
		1256.85	0
		1257.8	0
		1258.75	0
		1259.7	0
		1260.65	0
		1261.6	0
		1262.55	0
		1263.5	0
		1264.45	0
		1265.4	0
		1266.35	0
		1267.3	0
		1268.25	0
		1269.2	0
		1270.15	0
		1271.1	0
		1272.05	0
		1273	0
		1273.95	0
		1274.9	0
		1275.85	0
		1276.8	0
		1277.75	0
		1278.7	0
		1279.65	0
		1280.6	0
		1281.55	0
		1282.5	0
		1283.45	0
		1284.4	0
		1285.35	0
		1286.3	0
		1287.25	0
		1288.2	0
		1289.15	0
		1290.1	0
		1291.05	0
		1292	0
		1292.95	0
		1293.9	0
		1294.85	0
		1295.8	0
		1296.75	0
		1297.7	0
		1298.65	0
		1299.6	0
		1300.55	0
		1301.5	0
		1302.45	0
		1303.4	0
		1304.35	0
		1305.3	0
		1306.25	0
		1307.2	0
		1308.15	0
		1309.1	0
		1310.05	0
		1311	0
		1311.95	0
		1312.9	0
		1313.85	0
		1314.8	0
		1315.75	0
		1316.7	0
		1317.65	0
		1318.6	0
		1319.55	0
		1320.5	0
		1321.45	0
		1322.4	0
		1323.35	0
		1324.3	0
		1325.25	0
		1326.2	0
		1327.15	0
		1328.1	0
		1329.05	0
		1330	0
		1330.95	0
		1331.9	0
		1332.85	0
		1333.8	0
		1334.75	0
		1335.7	0
		1336.65	0
		1337.6	0
		1338.55	0
		1339.5	0
		1340.45	0
		1341.4	0
		1342.35	0
		1343.3	0
		1344.25	0
		1345.2	0
		1346.15	0
		1347.1	0
		1348.05	0
		1349	0
		1349.95	0
		1350.9	0
		1351.85	0
		1352.8	0
		1353.75	0
		1354.7	0
		1355.65	0
		1356.6	0
		1357.55	0
		1358.5	0
		1359.45	0
		1360.4	0
		1361.35	0
		1362.3	0
		1363.25	0
		1364.2	0
		1365.15	0
		1366.1	0
		1367.05	0
		1368	0
		1368.95	0
		1369.9	0
		1370.85	0
		1371.8	0
		1372.75	0
		1373.7	0
		1374.65	0
		1375.6	0
		1376.55	0
		1377.5	0
		1378.45	0
		1379.4	0
		1380.35	0
		1381.3	0
		1382.25	0
		1383.2	0
		1384.15	0
		1385.1	0
		1386.05	0
		1387	0
		1387.95	0
		1388.9	0
		1389.85	0
		1390.8	0
		1391.75	0
		1392.7	0
		1393.65	0
		1394.6	0
		1395.55	0
		1396.5	0
		1397.45	0
		1398.4	0
		1399.35	0
		1400.3	0
		1401.25	0
		1402.2	0
		1403.15	0
		1404.1	0
		1405.05	0
		1406	0
		1406.95	0
		1407.9	0
		1408.85	0
		1409.8	0
		1410.75	0
		1411.7	0
		1412.65	0
		1413.6	0
		1414.55	0
		1415.5	0
		1416.45	0
		1417.4	0
		1418.35	0
		1419.3	0
		1420.25	0
		1421.2	0
		1422.15	0
		1423.1	0
		1424.05	0
		1425	0
		1425.95	0
		1426.9	0
		1427.85	0
		1428.8	0
		1429.75	0
		1430.7	0
		1431.65	0
		1432.6	0
		1433.55	0
		1434.5	0
		1435.45	0
		1436.4	0
		1437.35	0
		1438.3	0
		1439.25	0
		1440.2	0
		1441.15	0
		1442.1	0
		1443.05	0
		1444	0
		1444.95	0
		1445.9	0
		1446.85	0
		1447.8	0
		1448.75	0
		1449.7	0
		1450.65	0
		1451.6	0
		1452.55	0
		1453.5	0
		1454.45	0
		1455.4	0
		1456.35	0
		1457.3	0
		1458.25	0
		1459.2	0
		1460.15	0
		1461.1	0
		1462.05	0
		1463	0
		1463.95	0
		1464.9	0
		1465.85	0
		1466.8	0
		1467.75	0
		1468.7	0
		1469.65	0
		1470.6	0
		1471.55	0
		1472.5	0
		1473.45	0
		1474.4	0
		1475.35	0
		1476.3	0
		1477.25	0
		1478.2	0
		1479.15	0
		1480.1	0
		1481.05	0
		1482	0
		1482.95	0
		1483.9	0
		1484.85	0
		1485.8	0
		1486.75	0
		1487.7	0
		1488.65	0
		1489.6	0
		1490.55	0
		1491.5	0
		1492.45	0
		1493.4	0
		1494.35	0
		1495.3	0
		1496.25	0
		1497.2	0
		1498.15	0
		1499.1	0
		1500.05	0
		1501	0
		1501.95	0
		1502.9	0
		1503.85	0
		1504.8	0
		1505.75	0
		1506.7	0
		1507.65	0
		1508.6	0
		1509.55	0
		1510.5	0
		1511.45	0
		1512.4	0
		1513.35	0
		1514.3	0
		1515.25	0
		1516.2	0
		1517.15	0
		1518.1	0
		1519.05	0
		1520	0
		1520.95	0
		1521.9	0
		1522.85	0
		1523.8	0
		1524.75	0
		1525.7	0
		1526.65	0
		1527.6	0
		1528.55	0
		1529.5	0
		1530.45	0
		1531.4	0
		1532.35	0
		1533.3	0
		1534.25	0
		1535.2	0
		1536.15	0
		1537.1	0
		1538.05	0
		1539	0
		1539.95	0
		1540.9	0
		1541.85	0
		1542.8	0
		1543.75	0
		1544.7	0
		1545.65	0
		1546.6	0
		1547.55	0
		1548.5	0
		1549.45	0
		1550.4	0
		1551.35	0
		1552.3	0
		1553.25	0
		1554.2	0
		1555.15	0
		1556.1	0
		1557.05	0
		1558	0
		1558.95	0
		1559.9	0
		1560.85	0
		1561.8	0
		1562.75	0
		1563.7	0
		1564.65	0
		1565.6	0
		1566.55	0
		1567.5	0
		1568.45	0
		1569.4	0
		1570.35	0
		1571.3	0
		1572.25	0
		1573.2	0
		1574.15	0
		1575.1	0
		1576.05	0
		1577	0
		1577.95	0
		1578.9	0
		1579.85	0
		1580.8	0
		1581.75	0
		1582.7	0
		1583.65	0
		1584.6	0
		1585.55	0
		1586.5	0
		1587.45	0
		1588.4	0
		1589.35	0
		1590.3	0
		1591.25	0
		1592.2	0
		1593.15	0
		1594.1	0
		1595.05	0
		1596	0
		1596.95	0
		1597.9	0
		1598.85	0
		1599.8	0
		1600.75	0
		1601.7	0
		1602.65	0
		1603.6	0
		1604.55	0
		1605.5	0
		1606.45	0
		1607.4	0
		1608.35	0
		1609.3	0
		1610.25	0
		1611.2	0
		1612.15	0
		1613.1	0
		1614.05	0
		1615	0
		1615.95	0
		1616.9	0
		1617.85	0
		1618.8	0
		1619.75	0
		1620.7	0
		1621.65	0
		1622.6	0
		1623.55	0
		1624.5	0
		1625.45	0
		1626.4	0
		1627.35	0
		1628.3	0
		1629.25	0
		1630.2	0
		1631.15	0
		1632.1	0
		1633.05	0
		1634	0
		1634.95	0
		1635.9	0
		1636.85	0
		1637.8	0
		1638.75	3.2248e-08
		1639.7	3.67247e-08
		1640.65	4.17848e-08
		1641.6	4.7499e-08
		1642.55	5.39454e-08
		1643.5	6.12111e-08
		1644.45	6.93922e-08
		1645.4	7.85952e-08
		1646.35	8.89378e-08
		1647.3	1.0055e-07
		1648.25	1.13575e-07
		1649.2	1.2817e-07
		1650.15	1.4451e-07
		1651.1	1.62785e-07
		1652.05	1.83204e-07
		1653	2.05996e-07
		1653.95	2.31414e-07
		1654.9	2.59732e-07
		1655.85	2.9125e-07
		1656.8	3.26295e-07
		1657.75	3.65226e-07
		1658.7	4.08429e-07
		1659.65	4.56328e-07
		1660.6	5.0938e-07
		1661.55	5.68084e-07
		1662.5	6.32976e-07
		1663.45	7.04641e-07
		1664.4	7.83706e-07
		1665.35	8.7085e-07
		1666.3	9.66804e-07
		1667.25	1.07236e-06
		1668.2	1.18835e-06
		1669.15	1.31569e-06
		1670.1	1.45536e-06
		1671.05	1.60838e-06
		1672	1.77588e-06
		1672.95	1.95905e-06
		1673.9	2.15913e-06
		1674.85	2.3775e-06
		1675.8	2.61556e-06
		1676.75	2.87485e-06
		1677.7	3.15697e-06
		1678.65	3.46362e-06
		1679.6	3.7966e-06
		1680.55	4.15781e-06
		1681.5	4.54925e-06
		1682.45	4.97302e-06
		1683.4	5.43132e-06
		1684.35	5.92646e-06
		1685.3	6.46086e-06
		1686.25	7.03704e-06
		1687.2	7.65764e-06
		1688.15	8.3254e-06
		1689.1	9.04315e-06
		1690.05	9.81386e-06
		1691	1.06406e-05
		1691.95	1.15264e-05
		1692.9	1.24747e-05
		1693.85	1.34887e-05
		1694.8	1.45718e-05
		1695.75	1.57277e-05
		1696.7	1.69597e-05
		1697.65	1.82717e-05
		1698.6	1.96672e-05
		1699.55	2.11501e-05
		1700.5	2.27242e-05
		1701.45	2.43931e-05
		1702.4	2.61609e-05
		1703.35	2.80312e-05
		1704.3	3.0008e-05
		1705.25	3.20949e-05
		1706.2	3.42958e-05
		1707.15	3.66143e-05
		1708.1	3.9054e-05
		1709.05	4.16184e-05
		1710	4.43108e-05
		1710.95	4.71346e-05
		1711.9	5.00927e-05
		1712.85	5.3188e-05
		1713.8	5.64233e-05
		1714.75	5.98009e-05
		1715.7	6.33232e-05
		1716.65	6.69919e-05
		1717.6	7.08087e-05
		1718.55	7.4775e-05
		1719.5	7.88916e-05
		1720.45	8.31592e-05
		1721.4	8.75779e-05
		1722.35	9.21476e-05
		1723.3	9.68676e-05
		1724.25	0.000101737
		1725.2	0.000106754
		1726.15	0.000111916
		1727.1	0.000117221
		1728.05	0.000122666
		1729	0.000128248
		1729.95	0.000133961
		1730.9	0.000139802
		1731.85	0.000145765
		1732.8	0.000151844
		1733.75	0.000158033
		1734.7	0.000164324
		1735.65	0.000170711
		1736.6	0.000177184
		1737.55	0.000183736
		1738.5	0.000190357
		1739.45	0.000197037
		1740.4	0.000203766
		1741.35	0.000210534
		1742.3	0.000217328
		1743.25	0.000224138
		1744.2	0.000230951
		1745.15	0.000237754
		1746.1	0.000244536
		1747.05	0.000251282
		1748	0.00025798
		1748.95	0.000264615
		1749.9	0.000271175
		1750.85	0.000277644
		1751.8	0.000284009
		1752.75	0.000290256
		1753.7	0.000296371
		1754.65	0.000302339
		1755.6	0.000308148
		1756.55	0.000313782
		1757.5	0.000319229
		1758.45	0.000324475
		1759.4	0.000329507
		1760.35	0.000334314
		1761.3	0.000338882
		1762.25	0.0003432
		1763.2	0.000347257
		1764.15	0.000351043
		1765.1	0.000354547
		1766.05	0.000357761
		1767	0.000360676
		1767.95	0.000363284
		1768.9	0.000365578
		1769.85	0.000367552
		1770.8	0.000369201
		1771.75	0.00037052
		1772.7	0.000371505
		1773.65	0.000372155
		1774.6	0.000372467
		1775.55	0.00037244
		1776.5	0.000372075
		1777.45	0.000371372
		1778.4	0.000370333
		1779.35	0.000368962
		1780.3	0.000367262
		1781.25	0.000365237
		1782.2	0.000362892
		1783.15	0.000360236
		1784.1	0.000357273
		1785.05	0.000354013
		1786	0.000350463
		1786.95	0.000346634
		1787.9	0.000342535
		1788.85	0.000338177
		1789.8	0.00033357
		1790.75	0.000328727
		1791.7	0.00032366
		1792.65	0.000318382
		1793.6	0.000312904
		1794.55	0.000307242
		1795.5	0.000301407
		1796.45	0.000295415
		1797.4	0.000289278
		1798.35	0.000283012
		1799.3	0.000276629
		1800.25	0.000270145
		1801.2	0.000263572
		1802.15	0.000256926
		1803.1	0.00025022
		1804.05	0.000243467
		1805	0.000236681
		1805.95	0.000229875
		1806.9	0.000223062
		1807.85	0.000216254
		1808.8	0.000209463
		1809.75	0.000202701
		1810.7	0.000195979
		1811.65	0.000189307
		1812.6	0.000182697
		1813.55	0.000176157
		1814.5	0.000169696
		1815.45	0.000163324
		1816.4	0.000157049
		1817.35	0.000150877
		1818.3	0.000144816
		1819.25	0.000138872
		1820.2	0.000133051
		1821.15	0.000127358
		1822.1	0.000121798
		1823.05	0.000116374
		1824	0.000111091
		1824.95	0.000105952
		1825.9	0.000100958
		1826.85	9.61124e-05
		1827.8	9.14161e-05
		1828.75	8.68702e-05
		1829.7	8.24753e-05
		1830.65	7.82316e-05
		1831.6	7.41387e-05
		1832.55	7.01961e-05
		1833.5	6.64028e-05
		1834.45	6.27573e-05
		1835.4	5.92581e-05
		1836.35	5.5903e-05
		1837.3	5.269e-05
		1838.25	4.96165e-05
		1839.2	4.66799e-05
		1840.15	4.38771e-05
		1841.1	4.12051e-05
		1842.05	3.86606e-05
		1843	3.62403e-05
		1843.95	3.39406e-05
		1844.9	3.17579e-05
		1845.85	2.96886e-05
		1846.8	2.77289e-05
		1847.75	2.5875e-05
		1848.7	2.41231e-05
		1849.65	2.24694e-05
		1850.6	2.091e-05
		1851.55	1.94412e-05
		1852.5	1.80591e-05
		1853.45	1.676e-05
		1854.4	1.55402e-05
		1855.35	1.43961e-05
		1856.3	1.33241e-05
		1857.25	1.23207e-05
		1858.2	1.13825e-05
		1859.15	1.05062e-05
		1860.1	9.68852e-06
		1861.05	8.92638e-06
		1862	8.21671e-06
		1862.95	7.55659e-06
		1863.9	6.94318e-06
		1864.85	6.37377e-06
		1865.8	5.84573e-06
		1866.75	5.35656e-06
		1867.7	4.90387e-06
		1868.65	4.48535e-06
		1869.6	4.09882e-06
		1870.55	3.7422e-06
		1871.5	3.4135e-06
		1872.45	3.11084e-06
		1873.4	2.83243e-06
		1874.35	2.5766e-06
		1875.3	2.34175e-06
		1876.25	2.12636e-06
		1877.2	1.92903e-06
		1878.15	1.74843e-06
		1879.1	1.58329e-06
		1880.05	1.43244e-06
		1881	1.29479e-06
		1881.95	1.1693e-06
		1882.9	1.05502e-06
		1883.85	9.51036e-07
		1884.8	8.56524e-07
		1885.75	7.70703e-07
		1886.7	6.9285e-07
		1887.65	6.22295e-07
		1888.6	5.58417e-07
		1889.55	5.00641e-07
		1890.5	4.48434e-07
		1891.45	4.01306e-07
		1892.4	3.58805e-07
		1893.35	3.20513e-07
		1894.3	2.86047e-07
		1895.25	2.55056e-07
		1896.2	2.27215e-07
		1897.15	2.0223e-07
		1898.1	1.79828e-07
		1899.05	1.59762e-07
[truncated: 1 more rows]

## Sheet: PlotDat9
Source sheet	ACH1-3B_ACH1_3B	0.51	0.0654	0.322419	0.045	0.343738	0.0476374	0.3	0.056902	0.529581	0.067013	0.533492	0.0670902	0.528857	0.0676334	0.534029	0.0675899	0.519805	0.0687684	0.540253	0.0675887	0.528582	0.067683	0.540254	0.067217	0.536029	0.0679583	0.535149	0.0677323	0.538758	0.0676913	0.547253	0.0691716	0.544925	0.0694838	0.558806	0.0684913	0.552596	0.0709217	0.539029	0.0709005	0.557149	0.0704723	0.583701	0.071194	0.573925	0.0710063	0.569477	0.0723326
Plot name	Concordia9	0.498	0.0657	0.330117	0.0459575	0.370468	0.0508927	0.85	0.090721	0.529119	0.0673938	0.53299	0.0675424	0.528424	0.0680697	0.533522	0.0680734	0.519316	0.0690528	0.539725	0.0680977	0.52813	0.0681926	0.539736	0.0677615	0.535523	0.0684499	0.534751	0.0682526	0.538356	0.0682247	0.546718	0.0696782	0.544307	0.0701265	0.558351	0.0690506	0.552144	0.0713725	0.5385	0.0713712	0.556737	0.070952	0.583122	0.0717381	0.573318	0.0716023	0.568903	0.0728497
Plot Type	1	0.5105	0.06636	0.343738	0.0476374	0.397729	0.0541582			0.527821	0.0676874	0.531533	0.0679443	0.527207	0.0684314	0.532074	0.0684863	0.517939	0.0692301	0.538204	0.0685457	0.526842	0.0686413	0.538224	0.0682644	0.534076	0.0688738	0.533597	0.0687389	0.537169	0.068733	0.54519	0.0701114	0.54254	0.0706895	0.557006	0.0695845	0.550869	0.0717505	0.537033	0.071734	0.555568	0.0713758	0.581445	0.0722238	0.571561	0.072137	0.567284	0.0732684
1st free col	79	0.512	0.06646	0.357498	0.0493199	0.425533	0.0574338			0.525745	0.0678811	0.529161	0.068285	0.52526	0.0687024	0.529748	0.0688107	0.515734	0.0692925	0.535755	0.0689129	0.524774	0.0690095	0.535785	0.0687037	0.531752	0.0692114	0.531716	0.0691776	0.535249	0.0691939	0.542736	0.0704523	0.5397	0.0711479	0.554831	0.0700698	0.548807	0.0720452	0.534689	0.0719729	0.553675	0.071732	0.578744	0.0726297	0.568731	0.0725871	0.564691	0.0735705
Sigma Level	2	0.499	0.0666	0.371399	0.0510051	0.45389	0.0607196			0.52298	0.0679663	0.525939	0.0685552	0.522668	0.0688711	0.526647	0.0690323	0.512798	0.0692371	0.532487	0.0691835	0.522017	0.0692811	0.532525	0.0690603	0.528652	0.069448	0.529162	0.069557	0.53268	0.0695874	0.539464	0.0706861	0.535911	0.071482	0.55192	0.0704851	0.546014	0.0722487	0.531573	0.0720776	0.551109	0.072011	0.575135	0.0729382	0.564951	0.0729329	0.561238	0.0737428
Absolute Errs	TRUE	0.517	0.0667	0.385442	0.0526931	0.482812	0.0640155			0.519648	0.0679394	0.521956	0.0687474	0.519545	0.0689301	0.522906	0.0691415	0.509259	0.0690665	0.528543	0.0693455	0.518691	0.0694443	0.528586	0.0693185	0.524912	0.0695733	0.526003	0.0698667	0.529574	0.0698962	0.535515	0.0708024	0.53134	0.0716769	0.548401	0.0708123	0.542566	0.0723554	0.52782	0.0720433	0.547939	0.0722051	0.570778	0.0731358	0.560386	0.0731592	0.557075	0.0737777
Symbol Type	1	0.509	0.0668	0.399629	0.0543837	0.512308	0.0673218			0.515894	0.0678015	0.517319	0.0688566	0.516025	0.0688767	0.518688	0.0691335	0.505271	0.0687881	0.524093	0.0693919	0.514942	0.069492	0.524141	0.0694671	0.520694	0.0695817	0.522326	0.0700981	0.526067	0.0701068	0.531063	0.0707963	0.526186	0.0717243	0.544427	0.0710372	0.538557	0.0723623	0.523593	0.0718717	0.544253	0.072309	0.565863	0.0732138	0.555236	0.0732562	0.552384	0.0736738
Inverse Plot	FALSE	0.517	0.06681	0.413962	0.0560771	0.542391	0.0706383			0.511883	0.0675586	0.512154	0.0688797	0.512265	0.0687134	0.514178	0.0690087	0.501009	0.0684141	0.519334	0.0693206	0.510933	0.069422	0.519384	0.0694995	0.516184	0.0694729	0.518231	0.070245	0.522313	0.07021	0.526302	0.0706679	0.520674	0.071622	0.540172	0.0711499	0.534096	0.0722694	0.519079	0.0715702	0.540151	0.07232	0.560604	0.0731688	0.549727	0.0732197	0.547371	0.0734355
Color Plot	TRUE	0.514	0.0669	0.428441	0.0577732	0.573073	0.0739651			0.507789	0.0672214	0.506604	0.068816	0.508427	0.0684472	0.509573	0.0687725	0.49666	0.0679608	0.514473	0.0691348	0.506839	0.0692374	0.514523	0.0694145	0.511579	0.0692516	0.513829	0.0703035	0.518475	0.0702014	0.521441	0.070423	0.515045	0.0713745	0.535822	0.0711455	0.529305	0.0720791	0.514474	0.071152	0.535745	0.0722377	0.555231	0.0730028	0.544098	0.0730511	0.542254	0.0730733
3D plot	FALSE	0.507	0.067	0.443068	0.059472	0.604365	0.0773023			0.503792	0.0668046	0.500819	0.0686673	0.50468	0.0680897	0.505073	0.0684352	0.492413	0.067448	0.509722	0.0688426	0.50284	0.0689463	0.50977	0.0692155	0.507079	0.0689276	0.509241	0.0702718	0.514722	0.0700813	0.516692	0.0700722	0.509545	0.0709927	0.531568	0.0710241	0.524315	0.0717966	0.509979	0.0706353	0.531155	0.0720643	0.549979	0.0727231	0.538596	0.0727579	0.537257	0.072603
Linear	FALSE	0.5204	0.06765	0.457846	0.0611736	0.636279	0.0806498			0.500067	0.0663264	0.494957	0.0684377	0.501187	0.0676567	0.500877	0.0680116	0.488453	0.0668982	0.505289	0.0684567	0.49911	0.0685613	0.505333	0.0689115	0.502882	0.068515	0.504592	0.0701508	0.511216	0.0698549	0.512262	0.0696308	0.504415	0.0704932	0.527595	0.0707911	0.519262	0.0714297	0.505791	0.0700429	0.526506	0.0718046	0.545077	0.0723418	0.533461	0.072353	0.532598	0.0720451
Data Range	H2:L57	0.524	0.068	0.472774	0.0628778	0.668829	0.0840077			0.496775	0.0658077	0.489179	0.0681334	0.498101	0.067167	0.497166	0.0675202	0.484955	0.0663353	0.501368	0.0679941	0.495812	0.0680994	0.501406	0.0685156	0.499171	0.0680318	0.500009	0.0699439	0.508112	0.0695321	0.508345	0.0691181	0.499879	0.0698978	0.524076	0.0704566	0.514283	0.0709883	0.502093	0.0694004	0.521925	0.0714657	0.540741	0.0718757	0.528918	0.0718539	0.528481	0.0714241
Filled Symbols	FALSE	0.518	0.0683	0.487856	0.0645849	0.702025	0.087376			0.494062	0.0652712	0.48364	0.0677628	0.495557	0.066642	0.494104	0.0669824	0.48207	0.065784	0.498131	0.0674749	0.493091	0.0675807	0.49816	0.0680452	0.496108	0.0674991	0.495616	0.0696568	0.505545	0.0691271	0.505112	0.0685565	0.496134	0.0692326	0.521166	0.0700354	0.509515	0.0704845	0.499046	0.0687361	0.517537	0.0710568	0.537158	0.071345	0.525165	0.0712826	0.525087	0.0707671
ConcAge	FALSE	0.538	0.06847	0.503092	0.0662946	0.735883	0.0907549			0.492045	0.0647403	0.478494	0.0673359	0.493667	0.0661047	0.491824	0.0664218	0.479926	0.0652683	0.495717	0.0669219	0.491065	0.0670279	0.495738	0.0675207	0.493827	0.0669402	0.491534	0.0692971	0.503627	0.0686575	0.502705	0.0679707	0.493345	0.0685266	0.518992	0.0695457	0.505088	0.069932	0.496784	0.068079	0.513462	0.0705891	0.534487	0.0707731	0.522367	0.070664	0.522563	0.0701027
ConcSwap	FALSE	0.522	0.0687	0.518484	0.0680071	0.770413	0.0941442			0.490812	0.0642383	0.473879	0.0668643	0.492512	0.0655786	0.490426	0.0658629	0.478615	0.0648109	0.494235	0.0663591	0.489822	0.0664651	0.494245	0.0669653	0.492427	0.0663796	0.487874	0.0688748	0.502442	0.0681439	0.501228	0.0673861	0.491634	0.0678107	0.517648	0.069009	0.501122	0.0693459	0.495406	0.0674578	0.50981	0.0700753	0.532843	0.0701848	0.520645	0.070025	0.521019	0.0694601
1st Symbol-row	1	0.517	0.0689	0.534033	0.0697224	0.805631	0.097544			0.490419	0.063787	0.469923	0.066361	0.492143	0.0650866	0.489971	0.0653301	0.478195	0.0644316	0.493747	0.0658113	0.489418	0.065917	0.493746	0.066403	0.491971	0.0658417	0.484735	0.0684013	0.502042	0.0676087	0.500747	0.0668284	0.491075	0.0671162	0.517194	0.0684487	0.497725	0.0687422	0.494971	0.0668995	0.506682	0.0695294	0.532299	0.069606	0.520075	0.0693937	0.520523	0.0688674
		0.529	0.0689	0.549742	0.0714404	IsoLine	IsoLine			0.490881	0.0634062	0.466732	0.0658396	0.492576	0.0646503	0.490478	0.0648466	0.478684	0.0641472	0.494275	0.0653023	0.48987	0.0654074	0.494264	0.0658585	0.492477	0.0653501	0.482204	0.0678897	0.502444	0.0670753	0.501282	0.0663218	0.491693	0.0664735	0.517649	0.0678894	0.494991	0.0681374	0.4955	0.0664288	0.504163	0.0689664	0.532878	0.0690619	0.520682	0.0687977	0.521097	0.0683503
		0.558	0.0704	0.565612	0.0731611					0.492179	0.0631126	0.464395	0.0653145	0.493793	0.0642886	0.491926	0.0644337	0.480061	0.0639699	0.495796	0.0648543	0.491158	0.0649587	0.495776	0.0653556	0.493924	0.0649262	0.480349	0.0673537	0.503631	0.066567	0.50281	0.0658886	0.49346	0.0659105	0.518994	0.0673555	0.492993	0.0675478	0.496967	0.066066	0.502321	0.0684015	0.534555	0.0685762	0.522439	0.068263	0.522716	0.0679316
		0.547	0.0702	0.581644	0.0748847					0.494255	0.0629189	0.462973	0.0647999	0.49574	0.0640176	0.494252	0.0641093	0.482266	0.0639075	0.498245	0.0644871	0.493226	0.0645905	0.498215	0.0649163	0.496248	0.0645886	0.479221	0.0668081	0.505551	0.0661061	0.505264	0.0655477	0.4963	0.0654521	0.521169	0.0668702	0.491786	0.0669897	0.499311	0.0658271	0.501207	0.0678503	0.537256	0.0681703	0.525269	0.0678129	0.525309	0.0676295
		0.545	0.0706	0.59784	0.076611					0.49702	0.0628337	0.462508	0.0643098	0.498332	0.0638489	0.497353	0.0638877	0.485202	0.0639629	0.501513	0.0642165	0.495983	0.0643189	0.501475	0.0645597	0.499348	0.064352	0.478851	0.0662677	0.50812	0.0657126	0.508536	0.0653139	0.500089	0.065118	0.52408	0.0664549	0.491404	0.0664783	0.502427	0.0657224	0.500851	0.0673277	0.540865	0.0678618	0.529049	0.0674671	0.528762	0.0674572
		0.5508	0.07084	0.614202	0.07834					0.500352	0.0628606	0.46301	0.0638576	0.501455	0.0637899	0.501094	0.0637785	0.488741	0.0641335	0.505457	0.0640545	0.499309	0.0641557	0.505414	0.0643015	0.503088	0.0642267	0.479249	0.0657474	0.511226	0.0654038	0.512485	0.0651976	0.50466	0.0649231	0.527599	0.0661277	0.491856	0.0660275	0.50618	0.0657567	0.501263	0.066848	0.545222	0.0676642	0.533614	0.0672408	0.532925	0.0674223
		0.565	0.071	0.630732	0.0800719					0.504106	0.0629985	0.464467	0.0634557	0.504975	0.0638433	0.505312	0.0637865	0.492729	0.0644119	0.509907	0.0640081	0.503058	0.064108	0.509859	0.0641529	0.507306	0.0642183	0.480403	0.0652611	0.514733	0.0651932	0.516937	0.0652037	0.509814	0.0648757	0.531573	0.0659028	0.493131	0.0656495	0.510407	0.0659283	0.502432	0.0664242	0.550137	0.0675862	0.538764	0.0671438	0.537616	0.0675262
		0.581	0.0717	0.647431	0.0818065					0.508117	0.0632414	0.466839	0.063115	0.508735	0.0640066	0.509822	0.0639113	0.496991	0.0647859	0.514666	0.0640794	0.507067	0.064178	0.514616	0.0641205	0.511816	0.0643271	0.482284	0.0648224	0.518487	0.06509	0.521698	0.0653321	0.515326	0.064978	0.535828	0.0657901	0.495193	0.0653548	0.514921	0.0662298	0.504325	0.066068	0.555396	0.0676312	0.544273	0.0671803	0.542629	0.0677645
		0.558	0.072	0.664301	0.0835439					0.512211	0.0635786	0.470061	0.0628448	0.512573	0.0642728	0.514427	0.0641475	0.50134	0.0652392	0.519527	0.0642652	0.511161	0.0643626	0.519477	0.0642055	0.516421	0.0645484	0.484838	0.064443	0.522325	0.0650986	0.526559	0.065577	0.520955	0.0652255	0.540178	0.0657945	0.497986	0.0651513	0.519526	0.066648	0.506891	0.065789	0.560769	0.0677972	0.549902	0.0673489	0.547746	0.0681267
		0.561	0.0729	0.681344	0.0852841					0.516208	0.0639954	0.474044	0.0626526	0.51632	0.0646303	0.518927	0.0644848	0.505587	0.065752	0.524278	0.0645574	0.51516	0.0646537	0.52423	0.0644045	0.520921	0.0648724	0.487997	0.0641333	0.526078	0.0652187	0.531308	0.0659278	0.526455	0.0656073	0.544432	0.0659159	0.501434	0.0650446	0.524021	0.0671647	0.510061	0.0655949	0.566021	0.0680769	0.555404	0.0676421	0.552743	0.068597
		0.564	0.0729	0.698561	0.0870271					0.519933	0.0644736	0.478681	0.0625434	0.519813	0.0650633	0.523123	0.0649084	0.509547	0.0663018	0.528711	0.0649433	0.51889	0.0650387	0.528667	0.0647085	0.525118	0.065285	0.491674	0.0639019	0.529584	0.0654451	0.535738	0.0663692	0.531585	0.0661068	0.548405	0.0661489	0.505443	0.0650377	0.528209	0.0677571	0.513747	0.065491	0.570923	0.0684582	0.560539	0.068047	0.557402	0.0691549
		0.626	0.0789	0.715954	0.0887729					0.523225	0.0649923	0.483846	0.0625203	0.522899	0.065553	0.526834	0.0653998	0.513045	0.0668647	0.532632	0.0654059	0.522188	0.0655006	0.532594	0.0651044	0.528829	0.0657682	0.495769	0.063755	0.532688	0.0657679	0.539655	0.0668819	0.536121	0.0667022	0.551924	0.0664834	0.509904	0.0651306	0.531907	0.0683996	0.517849	0.06548	0.575259	0.0689243	0.565082	0.0685461	0.561519	0.0697759
		0.665	0.0821	0.733526	0.0905215					0.525938	0.0655288	0.489396	0.062584	0.525443	0.066078	0.529896	0.0659376	0.51593	0.067416	0.535869	0.0659251	0.524909	0.0660193	0.53584	0.0655748	0.531892	0.0663009	0.500171	0.0636965	0.535255	0.0661729	0.542888	0.0674435	0.539866	0.0673674	0.554834	0.0669046	0.514695	0.0653209	0.534954	0.0690639	0.522255	0.0655623	0.578842	0.069455	0.568835	0.0691174	0.564913	0.0704329
		0.676	0.0853	0.751278	0.0922729					0.527955	0.0660597	0.495181	0.0627327	0.527333	0.0666153	0.532176	0.0664982	0.518074	0.0679317	0.538283	0.0664781	0.526935	0.0665721	0.538262	0.0660993	0.534173	0.0668598	0.504759	0.0637282	0.537173	0.0666425	0.545295	0.0680293	0.542655	0.0680734	0.557008	0.0673943	0.519685	0.0656034	0.537216	0.069721	0.526845	0.0657357	0.581513	0.0700269	0.571633	0.069736	0.567437	0.0710973
		0.732	0.08814	0.769211	0.0940271					0.529188	0.0665617	0.501043	0.0629623	0.528488	0.0671414	0.533574	0.0670571	0.519385	0.0683891	0.539765	0.0670409	0.528178	0.0671349	0.539755	0.0666547	0.535573	0.0674204	0.509408	0.0638492	0.538358	0.0671561	0.546772	0.0686139	0.544366	0.0687893	0.558352	0.067931	0.524738	0.0659703	0.538594	0.0703422	0.531494	0.0659954	0.583157	0.0706152	0.573355	0.070375	0.568981	0.0717399
		1.981	0.1843	0.787328	0.0957842					0.529581	0.067013	0.506821	0.0632666	0.528857	0.0676334	0.534029	0.0675899	0.519805	0.0687684	0.540253	0.0675887	0.528582	0.067683	0.540254	0.067217	0.536029	0.0679583	0.513991	0.0640561	0.538758	0.0676913	0.547253	0.0691716	0.544925	0.0694838	0.558806	0.0684913	0.529717	0.0664117	0.539029	0.0709005	0.536075	0.0663343	0.583701	0.071194	0.573925	0.0710063	0.569477	0.0723326
		1.92	0.185	0.805631	0.097544							0.51236	0.0636372															0.518384	0.0643432									0.534485	0.0669155			0.540463	0.0667432
		2.157	0.1966	0.824121	0.0993067							0.517506	0.0640641															0.522466	0.0647029									0.538912	0.067468			0.544538	0.0672109
		5.031	0.3168	0.831456	0.1							0.522121	0.0645357															0.526126	0.0651252									0.542878	0.0680541			0.54819	0.0677247
		IsoLine	IsoLine	IsoLine	IsoLine							0.526077	0.065039															0.529265	0.0655987									0.546275	0.0686578			0.551318	0.0682706
												0.529268	0.0655604															0.531796	0.0661103									0.549009	0.0692626			0.553837	0.0688336
												0.531605	0.0660855															0.533651	0.0666463									0.551007	0.0698522			0.555679	0.0693985
												0.533027	0.0666001															0.534779	0.0671919									0.552214	0.0704103			0.556793	0.0699497
												0.533492	0.0670902															0.535149	0.0677323									0.552596	0.0709217			0.557149	0.0704723
[truncated: 28 more columns]

## Sheet: PlotDat10
Source sheet	ACH1-3B_ACH1_3B	0.51	0.0654	0.134213	0.02	0.217708	0.0315113	0	0.0384553	0.529581	0.067013	0.533492	0.0670902	0.528857	0.0676334	0.534029	0.0675899	0.519805	0.0687684	0.540253	0.0675887	0.528582	0.067683	0.540254	0.067217	0.536029	0.0679583	0.535149	0.0677323	0.538758	0.0676913	0.547253	0.0691716	0.544925	0.0694838	0.558806	0.0684913	0.552596	0.0709217	0.539029	0.0709005	0.557149	0.0704723	0.583701	0.071194	0.573925	0.0710063	0.569477	0.0723326
Plot name	Concordia10	0.498	0.0657	0.153307	0.0227206	0.343738	0.0476374	4	0.284411	0.528742	0.0675114	0.532023	0.0678403	0.52807	0.0682108	0.533102	0.0682327	0.518916	0.0691302	0.539284	0.0682688	0.527756	0.0683639	0.539298	0.0679504	0.535104	0.0686129	0.533985	0.0686104	0.538013	0.0684136	0.546275	0.0698453	0.543794	0.0703418	0.557962	0.0692489	0.551297	0.0716552	0.538073	0.0715166	0.55596	0.0712665	0.582637	0.0719227	0.57281	0.0718051	0.568432	0.0730144
Plot Type	1	0.5105	0.06636	0.209465	0.0304083	0.482812	0.0640155			0.526384	0.0678387	0.527797	0.068417	0.52586	0.0686382	0.530465	0.0687319	0.516412	0.0692871	0.536509	0.0688218	0.525411	0.068918	0.536537	0.0685914	0.532468	0.0691288	0.530635	0.0693581	0.535841	0.0690741	0.543492	0.0703694	0.540574	0.0710345	0.555502	0.0699435	0.547624	0.0721494	0.53541	0.0719208	0.552588	0.0718689	0.579576	0.072528	0.569603	0.072474	0.565489	0.0735006
1st free col	79	0.512	0.06646	0.268357	0.0381538	0.636279	0.0806498			0.522698	0.0679685	0.521158	0.0687736	0.522405	0.0688811	0.526331	0.069047	0.512499	0.0692263	0.532154	0.0692028	0.521737	0.0693006	0.532193	0.069088	0.528336	0.0694641	0.52537	0.0699148	0.532418	0.0696192	0.53913	0.0707016	0.535525	0.0715056	0.551623	0.0705187	0.541876	0.0723641	0.531256	0.0720802	0.547305	0.0722308	0.574768	0.0729609	0.564565	0.0729586	0.560886	0.0737517
Sigma Level	2	0.499	0.0666	0.330117	0.0459575	0.805631	0.097544			0.517984	0.0678902	0.512642	0.0688812	0.517985	0.0689197	0.521037	0.0691525	0.507491	0.0689527	0.526571	0.0693811	0.51703	0.0694806	0.526617	0.0694001	0.523043	0.0695917	0.518617	0.0702353	0.528021	0.0700047	0.533542	0.0708149	0.529056	0.071717	0.546641	0.070928	0.534517	0.0722819	0.525947	0.071982	0.540539	0.0723229	0.568601	0.0731864	0.558105	0.0732197	0.554996	0.0737476
Absolute Errs	TRUE	0.517	0.0667	0.394884	0.0538199	0.99251	0.114702			0.512624	0.0676102	0.50294	0.068731	0.512959	0.068751	0.515011	0.0690399	0.501796	0.0684886	0.520213	0.0693422	0.511673	0.0694434	0.520263	0.0695024	0.517017	0.0695012	0.510923	0.0702937	0.523007	0.0701995	0.527182	0.0707002	0.521692	0.0716516	0.540958	0.0711381	0.526144	0.0719096	0.519913	0.0716341	0.532838	0.0721376	0.561575	0.0731861	0.550744	0.0732362	0.548296	0.0734884
Symbol Type	1	0.509	0.0668	0.462805	0.0617414	1.19873	0.132129			0.50705	0.0671511	0.492838	0.0683353	0.507734	0.0683885	0.508741	0.0687183	0.495874	0.0678714	0.513595	0.0690893	0.5061	0.0691921	0.513645	0.0693866	0.510747	0.0692	0.502911	0.0700853	0.517782	0.0701878	0.520563	0.0703667	0.514028	0.0713147	0.535036	0.071132	0.517436	0.0712772	0.513643	0.0710647	0.524826	0.0716901	0.55426	0.0729601	0.543081	0.0730068	0.54133	0.0729952
Inverse Plot	FALSE	0.517	0.06681	0.534033	0.0697224	1.42629	0.149828			0.501716	0.0665501	0.483154	0.0677261	0.502733	0.0678618	0.502735	0.0682137	0.490206	0.0671512	0.507252	0.0686427	0.500761	0.0687469	0.507298	0.069062	0.50474	0.0687125	0.49523	0.0696269	0.512769	0.0699704	0.514223	0.0698415	0.506686	0.0707335	0.529354	0.0709103	0.509097	0.0704361	0.507645	0.07032	0.517152	0.0710165	0.547247	0.0725267	0.535735	0.0725499	0.53466	0.072308
Color Plot	TRUE	0.514	0.0669	0.60873	0.0777634	1.67741	0.167804			0.497052	0.065856	0.474673	0.0669528	0.498361	0.0672133	0.497479	0.0675671	0.48525	0.0663864	0.501699	0.0680388	0.49609	0.0681441	0.501737	0.068555	0.499484	0.0680781	0.488503	0.0689557	0.508374	0.0695651	0.508675	0.0691671	0.500261	0.0699552	0.524373	0.0704909	0.501803	0.0694543	0.502405	0.0694602	0.510438	0.0701715	0.541106	0.071921	0.529301	0.0719026	0.528828	0.0714825
3D plot	FALSE	0.507	0.067	0.687063	0.0858648	1.95452	0.186061			0.493438	0.0651249	0.468081	0.066078	0.494973	0.0664957	0.4934	0.0668308	0.481408	0.0656388	0.497385	0.0673264	0.492465	0.0674323	0.497413	0.0679066	0.495403	0.0673483	0.483274	0.0681261	0.504953	0.0690046	0.504368	0.0683981	0.495273	0.0690428	0.520496	0.0699078	0.496146	0.0684114	0.498347	0.068555	0.505228	0.0692234	0.536334	0.0711921	0.524301	0.0711175	0.524307	0.0705854
Linear	FALSE	0.5204	0.06765	0.769211	0.0940271	2.2603	0.204603			0.491165	0.0644161	0.463914	0.0651725	0.492843	0.0657671	0.490828	0.0660644	0.478991	0.0649692	0.494661	0.0665633	0.490179	0.0666694	0.494675	0.0671693	0.492829	0.0665821	0.479968	0.0672052	0.502784	0.0683344	0.501652	0.0675969	0.492126	0.0680702	0.518036	0.0692081	0.492583	0.0673919	0.4958	0.0676778	0.501944	0.0682492	0.533316	0.070399	0.521141	0.070258	0.521462	0.0696895
Data Range	H2:L57	0.524	0.068	0.855359	0.102251	2.59774	0.223435			0.490419	0.063787	0.462508	0.0643098	0.492143	0.0650866	0.489971	0.0653301	0.478195	0.0644316	0.493747	0.0658113	0.489418	0.065917	0.493746	0.066403	0.491971	0.0658417	0.478851	0.0662677	0.502042	0.0676087	0.500747	0.0668284	0.491075	0.0671162	0.517194	0.0684487	0.491404	0.0664783	0.494971	0.0668995	0.500851	0.0673277	0.532299	0.069606	0.520075	0.0693937	0.520523	0.0688674
Filled Symbols	FALSE	0.518	0.0683	0.945702	0.110536	2.97009	0.242562			0.491258	0.0632886	0.463977	0.0635597	0.49293	0.0645092	0.490898	0.0646873	0.479084	0.0640698	0.494716	0.0651312	0.490244	0.0652361	0.494702	0.0656696	0.492896	0.0651871	0.480015	0.0653896	0.502787	0.0668864	0.501725	0.0661547	0.492206	0.0662582	0.518038	0.0676911	0.492703	0.0657448	0.495927	0.0662834	0.50204	0.0665335	0.533363	0.0688773	0.52119	0.0685949	0.521568	0.0681856
ConcAge	FALSE	0.538	0.06847	1.04044	0.118884	3.38099	0.261987			0.493616	0.0629613	0.468203	0.062983	0.49514	0.0640818	0.493535	0.0641881	0.481588	0.0639129	0.497491	0.0645782	0.492589	0.064682	0.497463	0.0650286	0.495532	0.0646712	0.483365	0.0646419	0.504959	0.0662259	0.504508	0.0656306	0.495426	0.0655655	0.520498	0.0669965	0.496376	0.0652506	0.49859	0.0658792	0.505412	0.0659311	0.536424	0.068272	0.524397	0.067926	0.524511	0.0676994
ConcSwap	FALSE	0.522	0.0687	1.1398	0.127295	3.83441	0.281716			0.497302	0.0628315	0.474842	0.0626264	0.498595	0.0638389	0.497669	0.063873	0.485501	0.0639737	0.501846	0.0641972	0.496263	0.0642994	0.501807	0.064532	0.499664	0.0643359	0.48863	0.0640852	0.508382	0.0656808	0.50887	0.0652984	0.500475	0.0650944	0.524377	0.0664213	0.502124	0.0650359	0.502744	0.0657198	0.510695	0.0655692	0.541232	0.0678391	0.529435	0.0674414	0.529114	0.0674483
1st Symbol-row	1	0.517	0.0689	1.24399	0.135768	IsoLine	IsoLine			0.502016	0.0629098	0.483358	0.0625188	0.503015	0.0638003	0.502963	0.0637675	0.490509	0.0642473	0.507429	0.0640189	0.50097	0.0641194	0.507383	0.0642199	0.504957	0.0642083	0.495383	0.0637647	0.512779	0.0652953	0.514458	0.0651851	0.506944	0.064883	0.529359	0.066012	0.509483	0.0651181	0.508053	0.065818	0.517461	0.0654771	0.547399	0.0676136	0.535895	0.0671803	0.535004	0.0674524
		0.529	0.0689	1.35326	0.144306					0.507376	0.0631898	0.49306	0.062669	0.508041	0.063969	0.508989	0.0638801	0.496204	0.0647114	0.513787	0.0640578	0.506327	0.0641566	0.513737	0.0641176	0.510983	0.0642988	0.503077	0.0637063	0.517793	0.0651005	0.520818	0.0652998	0.514308	0.0649484	0.535042	0.0658019	0.517856	0.0654904	0.514087	0.0661659	0.525162	0.0656624	0.554425	0.0676139	0.543256	0.0671638	0.541704	0.0677116
		0.558	0.0704	1.46784	0.152908					0.51295	0.0636489	0.503162	0.0630647	0.513266	0.0643315	0.515259	0.0642017	0.502126	0.0653286	0.520405	0.0643107	0.5119	0.0644079	0.520355	0.0642334	0.517253	0.0646	0.511089	0.0639147	0.523018	0.0651122	0.527437	0.0656333	0.521972	0.0652853	0.540964	0.065808	0.526564	0.0661228	0.520357	0.0667353	0.533174	0.0661099	0.56174	0.0678399	0.550919	0.0673932	0.54867	0.0682048
		0.547	0.0702	1.58801	0.161574					0.518284	0.0642499	0.512846	0.0636739	0.518267	0.0648582	0.521265	0.0647063	0.507794	0.0660488	0.526748	0.0647573	0.517239	0.0648531	0.526702	0.064558	0.52326	0.0650875	0.51877	0.0643731	0.528031	0.0653296	0.533777	0.0661585	0.529314	0.0658665	0.546646	0.0660297	0.534903	0.0669639	0.526355	0.06748	0.540848	0.0667835	0.568753	0.0682733	0.558265	0.0678501	0.55534	0.068892
		0.545	0.0706	1.71403	0.170305					0.522948	0.064944	0.521327	0.0644472	0.522639	0.0655067	0.526521	0.0653529	0.51275	0.0668136	0.532301	0.0653612	0.52191	0.0654559	0.532263	0.065065	0.528516	0.0657219	0.525497	0.0650443	0.532426	0.0657349	0.539325	0.0668329	0.535739	0.0666448	0.551627	0.0664491	0.542197	0.0679457	0.531595	0.0683398	0.547562	0.0676285	0.574894	0.068879	0.564699	0.0684974	0.561172	0.0697175
		0.5508	0.07084	1.84618	0.179102					0.526562	0.0656751	0.527919	0.065322	0.526027	0.0662243	0.5306	0.0660892	0.516592	0.0675612	0.536615	0.0660736	0.525535	0.0661677	0.536587	0.0657134	0.532597	0.0664517	0.530726	0.0658739	0.535847	0.0662954	0.543632	0.0676019	0.540727	0.0675572	0.555504	0.0670322	0.547854	0.0689886	0.535653	0.069245	0.552772	0.0685766	0.579666	0.0696079	0.569699	0.0692825	0.565693	0.0706146
		0.565	0.071	1.98477	0.187966					0.528835	0.0663839	0.532086	0.0662275	0.528157	0.0669529	0.533172	0.0668556	0.519009	0.0682308	0.539339	0.0668367	0.527821	0.0669306	0.539325	0.0664507	0.535171	0.0672179	0.534032	0.0667948	0.538016	0.0669656	0.546348	0.0684031	0.543874	0.0685298	0.557964	0.0677319	0.551417	0.0700081	0.5382	0.0701222	0.556056	0.0695508	0.582684	0.070401	0.572859	0.070142	0.568538	0.0715105
		0.581	0.0717	2.13011	0.196895					0.529581	0.067013	0.533492	0.0670902	0.528857	0.0676334	0.534029	0.0675899	0.519805	0.0687684	0.540253	0.0675887	0.528582	0.067683	0.540254	0.067217	0.536029	0.0679583	0.535149	0.0677323	0.538758	0.0676913	0.547253	0.0691716	0.544925	0.0694838	0.558806	0.0684913	0.552596	0.0709217	0.539029	0.0709005	0.557149	0.0704723	0.583701	0.071194	0.573925	0.0710063	0.569477	0.0723326
		0.558	0.072	2.28252	0.205892
		0.561	0.0729	2.44236	0.214957
		0.564	0.0729	2.60998	0.22409
		0.626	0.0789	2.78576	0.233291
		0.665	0.0821	2.97009	0.242562
		0.676	0.0853	3.16341	0.251902
		0.732	0.08814	3.36614	0.261312
		1.981	0.1843	3.57874	0.270793
		1.92	0.185	3.80169	0.280346
		2.157	0.1966	4	0.288509
		5.031	0.3168	IsoLine	IsoLine
		IsoLine	IsoLine
[truncated: 28 more columns]

## Sheet: Appendix Geochron
Table A2 U–Th–Pb LA-ICPMS data.
Ages highlighted in yellow are those used in the weighted mean averages.
Sample	Grain spot	207Pb/235U	±2σ	206Pb/238U	±2σ	238U/206Pb	±2σ	207Pb/206Pb	±2σ	Age (Ma) 206Pb/238U	±	Age (Ma) 207Pb/206Pb	±	Age (Ma) 207Pb/235U	±	% Disc	U (ppm)	Th (ppm)	Pb (ppm)	U/Th
ACH1-3	ACH1-3-01	0.5508	0.016	0.07084	0.0022	14.1163	0.438395	0.0567	0.0013	441.2	13	463	49	446.3	11	4.70842	398	258	299	1.601
	ACH1-3-02	0.5105	0.015	0.06636	0.0021	15.0693	0.476877	0.05587	0.001	414.1	13	444	42	418.5	9.9	6.73423	722	613	715	1.27
	ACH1-3-03	0.529	0.023	0.0689	0.0028	14.5138	0.58982	0.0562	0.0017	430	17	457	66	430	15	5.9081	760	386	407	1.947
	ACH1-3-04	0.561	0.02	0.0729	0.0024	13.7174	0.451602	0.056	0.0014	453.7	15	436	56	451.8	13	-4.05963	443	220.6	275.8	2.039
	ACH1-3-05	4.89	0.68	0.0884	0.0083	11.3122	1.06212	0.312	0.024	543	49	3160	140	1490	130	82.8165	493	260	2310	2.13
	ACH1-3-06	0.512	0.018	0.06646	0.0022	15.0466	0.498083	0.0561	0.0014	414.7	13	442	56	418.7	12	6.17647	649	399	439	1.764
	ACH1-3-07	0.509	0.016	0.0668	0.0022	14.9701	0.493026	0.0566	0.0015	416.9	13	471	59	418.3	11	11.4862	930	562	576	1.681
	ACH1-3-08	2.55	0.13	0.0993	0.0036	10.0705	0.365093	0.1828	0.0059	611	21	2653	55	1268	39	76.9695	1081	198	2558	5.698
	ACH1-3-09	0.912	0.035	0.0913	0.0031	10.9529	0.371895	0.0729	0.0025	562.9	18	1005	67	657	18	43.99	322.1	110	255	3.059
	ACH1-3-10	0.63	0.027	0.0712	0.0025	14.0449	0.493151	0.0651	0.0022	443.1	15	787	71	497	17	43.6976	220	123	189	1.838
	ACH1-3-11	0.517	0.019	0.06681	0.0022	14.9678	0.492878	0.0558	0.0016	416.9	13	434	61	421.7	13	3.94009	389	208	210.9	1.883
	ACH1-3-12	0.499	0.017	0.0666	0.0022	15.015	0.495991	0.056	0.0013	415.7	13	436	52	409.5	12	4.65596	639	381	416	1.487
	ACH1-3-13	1.24	0.27	0.144	0.026	6.94444	1.25386	0.0625	0.0035	820	130	714	91	737	99	-14.8459	155	95	116	1.558
	ACH1-3-14	0.5204	0.015	0.06765	0.0021	14.782	0.458864	0.0558	0.0012	421.9	13	435	47	425.5	10	3.01149	458	315	361	1.536
	ACH1-3-15	0.535	0.023	0.0683	0.0025	14.6413	0.535918	0.0573	0.0021	425.6	15	491	80	434	15	13.3198	703	571	530	1.23
	ACH1-3-16	0.607	0.031	0.0646	0.0024	15.4799	0.575104	0.0702	0.0039	403.5	15	890	110	480	19	no value	968	909	902	1.012
	ACH1-3-17	0.517	0.019	0.0667	0.0022	14.9925	0.494505	0.0559	0.0015	416.2	13	434	61	422	13	4.10138	1034	963	930	1
	ACH1-3-18	0.558	0.021	0.0704	0.0023	14.2045	0.464069	0.057	0.0017	438.3	14	476	67	450	13	7.92017	468	257	259	1.736
	ACH1-3-19	1.981	0.069	0.1843	0.006	5.42594	0.176645	0.0795	0.002	1090	33	1173	49	1113	24	7.07587	162	265	719	0.577
	ACH1-3-20	0.565	0.025	0.071	0.0025	14.0845	0.495933	0.0574	0.0023	441.9	15	494	87	453	16	10.5466	277	193	221	1.383
	ACH1-3-21	0.538	0.017	0.06847	0.0022	14.6049	0.469269	0.0567	0.0015	426.9	13	480	58	436.3	11	11.0625	677	576	569	1.212
	ACH1-3-22	0.514	0.018	0.0669	0.0022	14.9477	0.491553	0.0561	0.0014	417.3	14	452	54	421.7	12	7.67699	997	429	401	2.212
	ACH1-3-23	0.517	0.018	0.0689	0.0026	14.5138	0.54769	0.055	0.0014	430	16	427	56	424.5	12	-0.702576	1571	1120	1096	1.335
	ACH1-3-24	0.558	0.019	0.072	0.0023	13.8889	0.443673	0.0566	0.0015	447.9	14	459	61	451.4	12	2.4183	821	476	524	1.97
	ACH1-3-25	0.545	0.02	0.0706	0.0026	14.1643	0.521632	0.057	0.0016	439.5	16	484	63	441	13	9.19421	682	512	514	1.295
	ACH1-3-26	0.796	0.028	0.072	0.0024	13.8889	0.462963	0.0809	0.0022	448	15	1218	52	595	16	63.2184	831	544	485	1.516
	ACH1-3-27	0.574	0.026	0.0684	0.0036	14.6199	0.769467	0.0607	0.0015	426	22	629	54	462	17	32.2734	851	236	276	3.81
	ACH1-3-28	0.564	0.021	0.0729	0.0026	13.7174	0.489236	0.0571	0.0013	453.7	16	486	52	454.4	13	6.64609	816	564	625	1.527
	ACH1-3-29	1.16	0.17	0.0761	0.0034	13.1406	0.587097	0.116	0.016	473	20	1760	230	771	77	73.125	349	170	240	1.66
	ACH1-3-30	0.556	0.018	0.0709	0.0023	14.1044	0.457547	0.0576	0.0014	441.4	14	520	52	448.4	12	15.1154	1126	894	946	1.278
	ACH1-3-31	0.535	0.025	0.0676	0.0025	14.7929	0.547075	0.0575	0.0021	421.6	15	490	80	434	17	13.9592	1060	850	793	1.387
	ACH1-3-32	0.547	0.022	0.0702	0.0025	14.245	0.507301	0.0572	0.002	438.7	15	475	80	442	15	7.64211	642	358	426	1.97
	ACH1-3-33	0.51	0.016	0.0654	0.0021	15.2905	0.49098	0.0563	0.0013	408.3	13	457	54	417.8	11	10.6565	885	1019	925	0.949
	ACH1-3-34	0.613	0.026	0.072	0.0027	13.8889	0.520833	0.0622	0.002	448	16	661	69	484	16	32.2239	752	445	488	1.79
	ACH1-3-35	0.524	0.019	0.068	0.0023	14.7059	0.497405	0.0566	0.0017	424	14	464	69	427	13	8.62069	785	446	423	1.931
	ACH1-3-36	0.498	0.029	0.0657	0.0026	15.2207	0.602341	0.0562	0.0028	410	16	444	100	410	20	7.65766	480	241	256	2.24
	ACH1-3B-01	0.87	0.037	0.1002	0.0041	9.98004	0.408365	0.063	0.001	615.5	24	702	35	635.9	21	12.3219	1335	249	473	6.3
	ACH1-3B-02	0.665	0.029	0.0821	0.0034	12.1803	0.50442	0.058	0.0013	508.7	20	528	49	516.9	18	3.6553	445	333.8	433	1.318
	ACH1-3B-03	0.626	0.027	0.0789	0.0032	12.6743	0.514039	0.0579	0.0011	489.3	19	520	43	493.9	17	5.90385	455	271	330	1.486
	ACH1-3B-04	0.518	0.022	0.0683	0.0028	14.6413	0.600229	0.0548	0.0011	425.9	17	397	46	425.5	15	-7.2796	588	397.4	447	1.449
	ACH1-3B-05	0.507	0.023	0.067	0.0027	14.9254	0.60147	0.0553	0.0014	417.7	16	412	55	417.7	15	-1.3835	331	258	302	1.311
	ACH1-3B-06	1.198	0.09	0.1208	0.0088	8.27815	0.603044	0.0703	0.0014	707	38	920	43	760	31	23.1522	327	118	286	9.5
	ACH1-3B-07	0.732	0.03	0.08814	0.0035	11.3456	0.450528	0.06037	0.00091	544.4	21	612	31	558.6	17	11.0458	590	9.6	30.8	112.3
	ACH1-3B-08	0.676	0.029	0.0853	0.0035	11.7233	0.481028	0.0575	0.0011	527.7	21	517	39	523.7	17	-2.06963	802	501	635	1.486
	ACH1-3B-09	4.68	0.22	0.1018	0.0049	9.82318	0.472825	0.34	0.0065	624	28	3660	29	1753	40	82.9508	1850	1500	9660	1.574
	ACH1-3B-10	5.031	0.2	0.3168	0.013	3.15657	0.129531	0.1156	0.0022	1775	63	1884	33	1827	35	5.78556	211.2	115.8	590	1.72
	ACH1-3B-11	1.733	0.093	0.125	0.005	8	0.32	0.1018	0.0033	759.4	29	1604	58	1007	32	52.6559	946	166.8	959	5.68
	ACH1-3B-12	1.29	0.056	0.133	0.0054	7.5188	0.305275	0.07101	0.00098	805	31	954	29	839	25	15.6184	472	392	886	1.173
	ACH1-3B-13	0.522	0.025	0.0687	0.003	14.556	0.635635	0.0558	0.0013	428	18	444	52	426	17	3.6036	670	441	215	2.06
	ACH1-3B-14	0.581	0.035	0.0717	0.0031	13.947	0.603008	0.0577	0.0021	446.1	18	482	77	459	20	7.44813	223	206.1	253	1.028
	ACH1-3B-15	1.92	0.079	0.185	0.0074	5.40541	0.216216	0.07546	0.00096	1095	40	1077	25	1088	27	-1.67131	299	570	1605	0.519
	ACH1-3B-16	7.13	0.38	0.3388	0.015	2.95159	0.130679	0.1502	0.0024	1880	73	2340	27	2117	48	19.6581	706	416	1770	1.862
	ACH1-3B-17	1.031	0.048	0.0984	0.0043	10.1626	0.444097	0.076	0.0027	605	25	1080	71	717	23	43.9815	744	734	1093	1.208
	ACH1-3B-18	0.89	0.048	0.0644	0.0027	15.528	0.651017	0.1035	0.0042	401.9	16	1666	76	642	26	no value	653	374	847	2.19
	ACH1-3B-19	2.157	0.096	0.1966	0.0082	5.08647	0.212152	0.0801	0.0017	1159	43	1190	41	1167	32	2.60504	370	180.1	622	2.251
	ACH1-3B-20	7.76	0.61	0.347	0.028	2.88184	0.232541	0.1641	0.002	1870	130	2495	21	2139	66	25.0501	533	2330	3030	0.357
ACH4-5	ACH4-5A-01	0.528	0.02	0.069	0.0024	14.4927	0.504096	0.055	0.0017	430	14	425	64	430	13	-1.17647	711	460	439	1
	ACH4-5A-02	0.676	0.064	0.0695	0.0073	14.3885	1.51131	0.073	0.0026	426	42	987	74	482	27	56.8389	775	253	393	3
	ACH4-5A-03	0.525	0.016	0.0675	0.0022	14.8148	0.482853	0.0563	0.0012	421	13	453	49	428	11	7.06402	1619	2052	2162	1
	ACH4-5A-04	0.512	0.024	0.0666	0.0022	15.015	0.495991	0.0559	0.0026	415	13	414	95	418	16	-0.241546	407	265	292	2
	ACH4-5A-05	0.552	0.022	0.0706	0.0024	14.1643	0.481506	0.0568	0.0021	440	14	465	82	445	14	5.37634	338	220	291	2
	ACH4-5A-06	0.539	0.021	0.0699	0.0023	14.3062	0.470732	0.056	0.0018	436	14	449	63	437	14	2.89532	419	226	237	2
	ACH4-5A-06	0.552	0.019	0.0706	0.0023	14.1643	0.461443	0.0568	0.0017	440	14	489	61	448	13	10.0204	265	246	318	1
	ACH4-5A-07	0.507	0.017	0.0656	0.002	15.2439	0.464753	0.0562	0.0015	410	12	443	59	417	11	7.44921	358	341	383	1
	ACH4-5A-08	0.508	0.023	0.0666	0.0023	15.015	0.518537	0.0551	0.0022	415	14	406	92	416	16	-2.21675	275	215	232	1
	ACH4-5A-09	0.81	0.028	0.0983	0.0032	10.1729	0.331164	0.061	0.0017	604	19	616	60	602	16	1.94805	178	712	1035	0
	ACH4-5A-10	1.32	0.042	0.1391	0.0045	7.18907	0.232572	0.0689	0.0016	839	25	879	49	853	18	4.55063	244	207	465	1
	ACH4-5A-11	0.503	0.022	0.06525	0.0027	15.3257	0.634166	0.0563	0.0012	407.4	16	450	45	414.1	15	9.46667	NAN	NAN	41	39
	ACH4-5A-12	1.15	0.11	0.0679	0.0041	14.7275	0.889292	0.118	0.0067	422	24	1730	110	721	45	75.6069	NAN	NAN	49	40
	ACH4-5A-13	1.214	0.05	0.1285	0.0052	7.7821	0.314918	0.06899	0.00099	780	29	902	28	809.7	23	13.5255	NAN	NAN	41	18
	ACH4-5A-14	0.528	0.023	0.0677	0.0028	14.7711	0.610915	0.0562	0.0013	422.2	17	444	50	430.7	16	4.90991	NAN	NAN	34	82
	ACH4-5A-15	0.55	0.03	0.0687	0.0031	14.556	0.656823	0.0569	0.0016	428.1	18	467	62	443	19	8.32976	NAN	NAN	47	130
	ACH4-5B-01	8.58	0.34	0.4307	0.017	2.3218	0.091643	0.1442	0.0013	2309	76	2274	15	2294	36	-1.53914	695	236	1425	3.23
	ACH4-5B-02	11.03	0.72	0.335	0.02	2.98508	0.178213	0.2347	0.0029	1843	98	3085	20	2476	67	40.2593	491	126	698	3.13
	ACH4-5B-03	3.92	0.36	0.224	0.02	4.46429	0.398597	0.1243	0.0016	1242	95	2020	22	1495	75	38.5149	640	122	261	5.69
	ACH4-5B-04	2.36	0.27	0.0822	0.0069	12.1654	1.02119	0.1998	0.0099	503	40	2818	81	1109	76	82.1505	2460	806	4630	3.98
	ACH4-5B-05	2	0.12	0.072	0.0032	13.8889	0.617284	0.195	0.0064	447.9	19	2783	57	1102	40	83.9059	2260	565	5300	4.76
	ACH4-5B-06	0.525	0.024	0.0657	0.0028	15.2207	0.648675	0.0582	0.0014	409.9	17	538	55	428.1	16	23.8104	938	713	759	1.286
	ACH4-5B-07	1.94	0.099	0.181	0.0077	5.52486	0.235036	0.0778	0.0022	1072	42	1126	57	1090	35	4.79574	98.6	41.1	125	2.65
	ACH4-5B-08	1.777	0.07	0.171	0.0067	5.84795	0.22913	0.0762	0.00073	1017.1	37	1095	19	1036.6	26	7.11416	505	649	1827	0.6802
	ACH4-5B-09	4.802	0.2	0.3162	0.013	3.16255	0.130023	0.1109	0.0016	1774	63	1805	27	1782	35	1.71745	292	322	1619	0.789
	ACH4-5B-10	1.822	0.075	0.1772	0.007	5.64334	0.222931	0.0749	0.0011	1052	39	1054	29	1051	27	0.189753	499	120.9	331	3.96
	ACH4-5B-11	0.562	0.026	0.071	0.0029	14.0845	0.575283	0.0576	0.0013	442.1	18	542	49	451	17	18.4317	836	802	877	1.067
	ACH4-5B-12	0.5075	0.021	0.06646	0.0026	15.0466	0.588644	0.05618	0.00082	414.7	16	442	32	417.1	14	6.17647	595	499	553	1.116
	ACH4-5B-13	3.79	0.15	0.277	0.011	3.61011	0.143362	0.0999	0.0012	1576	55	1623	22	1590	31	2.89587	493	425	1807	1.0463
	ACH4-5B-14	0.547	0.024	0.06577	0.0027	15.2045	0.624178	0.0602	0.0013	410.5	16	607	46	443.4	16	32.3723	394.6	307.3	384	1.179
	ACH4-5B-15	0.0157	0.0019	0.001907	9.3e-05	524.384	25.573	0.0642	0.0078	12.28	0.6	250	210	15.8	1.9	95.088	479	566	24.6	0.797
	ACH4-5B-15A	6.62	0.78	0.203	0.013	4.92611	0.315465	0.225	0.013	1172	65	2889	91	1908	80	59.4323	565	1300	3280	0.606
	ACH4-5B-16	2.008	0.1	0.1641	0.0068	6.09384	0.252518	0.0895	0.0034	979	37	1378	70	1116	33	28.955	462	674	1830	0.924
	ACH4-5B-17	0.529	0.033	0.068	0.0036	14.7059	0.778547	0.0562	0.0023	424	22	472	88	429	21	10.1695	262	160	185	2.252
	ACH4-5B-18	0.509	0.023	0.06676	0.0027	14.979	0.605803	0.0553	0.0015	416.5	16	406	57	416.6	15	-2.58621	563	441	529	1.804
	ACH4-5B-19	0.508	0.023	0.0657	0.0027	15.2207	0.625508	0.0564	0.0014	410.2	16	446	52	415.9	15	8.02691	521	361	403	2.049
	ACH4-5B-20	0.67	0.029	0.0804	0.0033	12.4378	0.510507	0.0604	0.0012	499	19	599	44	518.9	18	16.6945	399	366	491	1.523
	ACH4-5B-21	0.584	0.028	0.0618	0.0026	16.1812	0.680764	0.0683	0.0023	386.2	16	855	72	464	18	54.8304	743	270	471	3.86
	ACH4-5B-22	0.315	0.04	0.0333	0.0026	30.03	2.34469	0.0621	0.0038	211	16	530	110	252	22	60.1887	250	369	176	0.897
	ACH4-5B-23	0.1977	0.01	0.02775	0.0011	36.036	1.42846	0.0525	0.0018	176.5	6.9	264	70	183.2	8.3	33.1439	343	536	254	0.908
	ACH4-5B-24	0.573	0.04	0.0662	0.0043	15.1057	0.981189	0.0615	0.0015	407	22	632	51	449	22	35.6013	800	1010	840	1.79
	ACH4-5B-25	0.891	0.04	0.0669	0.0029	14.9477	0.647956	0.0966	0.0023	417.2	17	1554	43	645	21	73.1532	1678	923	1931	2.33
	ACH4-5B-26	0.748	0.049	0.0681	0.0028	14.6843	0.603759	0.0785	0.0037	424.7	17	1104	92	561	28	61.5308	1142	1080	1520	1.162
	ACH4-5B-27	0.699	0.044	0.0775	0.0032	12.9032	0.532778	0.0646	0.0026	480.9	19	639	55	524	21	24.7418	714	485	670	1.462
	ACH4-5B-28	0.383	0.021	0.02812	0.0012	35.5619	1.51758	0.0993	0.0042	178.7	7.4	1645	76	332	15	89.1368	484	684	436	0.711
	ACH4-5B-29	0.538	0.023	0.0655	0.0027	15.2672	0.629334	0.0597	0.0013	408.7	17	590	48	436.5	15	30.7288	449	272.6	324	1.535
	ACH4-5B-30	0.891	0.044	0.0903	0.0039	11.0742	0.478288	0.0711	0.0018	558	23	961	46	644	23	41.9355	660	439	910	1.278
	ACH4-5B-31	0.747	0.04	0.0651	0.0028	15.361	0.660687	0.0815	0.0029	406.4	17	1216	70	563	23	66.5789	164.6	69.4	150.5	2.236
	ACH4-5B-32	0.599	0.038	0.0723	0.0035	13.8313	0.669563	0.0595	0.0023	450	21	564	83	473	24	20.2128	496	256	365	1.675
	ACH4-5B-33	0.594	0.027	0.06587	0.0027	15.1814	0.622284	0.0641	0.0016	411.7	16	762	51	471.8	17	45.9711	966	320	485	2.675
	ACH4-5B-34	1.521	0.068	0.1055	0.0056	9.47867	0.503133	0.1081	0.0031	644	32	1732	56	937	27	62.8176	473	199	759	2.54
	ACH4-5B-35	0.508	0.026	0.0664	0.003	15.0602	0.680433	0.0555	0.0021	414.5	18	422	83	418	17	1.77725	345	114	148	5.8
	ACH4-5B-36	0.488	0.025	0.0637	0.0027	15.6986	0.665403	0.0551	0.0016	398.2	16	403	67	405	17	1.19107	560	336	346	1.681
	ACH4-5B-37	0.499	0.024	0.0658	0.0027	15.1976	0.623608	0.0548	0.0016	410.8	16	413	65	409.6	16	0.532688	535	412	516	1.35
	ACH4-5B-38	0.967	0.061	0.0653	0.0074	15.3139	1.73542	0.242	0.026	401	45	2440	200	680	31	83.5656	800	900	790	3.28
	ACH4-5B-39	0.552	0.024	0.0703	0.003	14.2248	0.607031	0.0565	0.0013	438	18	469	49	445.7	16	6.60981	826	794	837	1.1
	ACH4-5B-40	0.593	0.027	0.0714	0.0029	14.0056	0.568855	0.0596	0.0013	444.2	17	590	47	472	17	24.7119	1440	1260	1320	1.226
	ACH4-5B-41	1.16	0.11	0.1182	0.0091	8.46024	0.651338	0.071	0.0044	713	52	950	100	775	50	24.9474	155	172	259	0.864
	ACH4-5B-42	0.543	0.026	0.0704	0.0029	14.2045	0.58513	0.056	0.0015	438.5	18	439	58	440	17	0.113895	591	462	456	1.68
	ACH4-5B-43	0.591	0.035	0.0664	0.0034	15.0602	0.771157	0.0663	0.0035	416	21	762	76	466	22	45.4068	1210	960	980	1.36
	ACH4-5B-44	1.952	0.081	0.1866	0.0075	5.35906	0.215396	0.0758	0.0013	1102	41	1095	33	1099	28	-0.639269	594	463	1249	1.258
ACH9	ACH9-01	0.542	0.025	0.0658	0.0023	15.1976	0.531222	0.061	0.0025	411	14	608	85	438	16	32.4013	555	403	417	1
	ACH9-02	0.501	0.019	0.0665	0.0023	15.0376	0.520097	0.0549	0.0018	415	14	386	73	413	13	-7.51295	353	204	199	2
	ACH9-03	0.566	0.019	0.0683	0.0022	14.6413	0.471608	0.0607	0.0015	426	13	628	52	455	12	32.1656	630	335	391	2
	ACH9-04	0.547	0.021	0.0706	0.0026	14.1643	0.521632	0.057	0.0019	440	15	471	73	442	14	6.58174	557	265	265	2
	ACH9-05	0.485	0.014	0.0642	0.002	15.5763	0.485244	0.0553	0.0011	401	12	412	46	401.2	9.6	2.6699	410	294	281	1
	ACH9-06	0.739	0.027	0.076	0.0025	13.1579	0.432825	0.0709	0.0021	472	15	947	61	561	16	50.1584	133	91	136	1
	ACH9-07	0.806	0.027	0.0705	0.0024	14.1844	0.482873	0.084	0.0023	439	15	1290	57	599	15	65.969	369	190	333	2
	ACH9-08	2.09	0.19	0.0857	0.0031	11.6686	0.422085	0.172	0.012	530	18	2370	120	1066	58	77.6371	461	356	1455	1
	ACH9-09	1.907	0.088	0.0824	0.0026	12.1359	0.38293	0.1722	0.0057	511	16	2590	59	1095	29	80.2703	512	403	1333	1
	ACH9-10	1.75	0.15	0.0814	0.0028	12.285	0.42258	0.158	0.011	504	16	2320	120	991	52	78.2759	525	489	1636	1
	ACH9-11	0.503	0.017	0.0661	0.0021	15.1286	0.480636	0.0558	0.0015	413	13	420	59	413	12	1.66667	242	142	147	2
	ACH9-12	0.508	0.022	0.0667	0.0023	14.9925	0.516983	0.0562	0.0021	416	14	424	79	417	14	1.88679	222	121	122	2
	ACH9-13	2.46	0.25	0.0939	0.0034	10.6496	0.385609	0.186	0.015	578	20	2320	150	1165	73	75.0862	254	159	925	2
	ACH9-14	10.3	1.1	0.153	0.01	6.53595	0.427186	0.417	0.022	907	57	3960	77	2190	100	77.096	409	341	4331	1
	ACH9-15	0.892	0.04	0.0798	0.0027	12.5313	0.423992	0.0824	0.0034	495	16	1252	86	645	22	60.4633	214	76	155	3
	ACH9-16	19.2	2.9	0.232	0.026	4.31034	0.483056	0.376	0.036	1270	130	3100	200	2100	190	59.0323	412	332	7281	1
	ACH9-17	1.153	0.083	0.0815	0.0026	12.2699	0.391434	0.1078	0.0069	505	15	1650	110	751	34	69.3939	321	236	622	1
	ACH9-18	31.1	9.5	0.41	0.1	2.43902	0.594884	0.372	0.031	1500	280	3380	170	969	61	55.6213	291	155	1650	2
	ACH9-18	1.72	0.16	0.0835	0.003	11.9761	0.430277	0.147	0.011	516	18	2190	150	2240	210	76.4384	542	306	984	2
	ACH9-19	6.68	0.2	0.385	0.012	2.5974	0.080958	0.1279	0.0024	2099	55	2062	33	2065	26	-1.79437	415	167	1440	2
	ACH9-20	1.69	0.21	0.0849	0.0033	11.7786	0.457824	0.128	0.011	523	19	1780	130	872	59	70.618	255	176	595	1
	ACH9-21	0.505	0.016	0.0656	0.0021	15.2439	0.487991	0.0564	0.0017	410	13	445	72	415	11	7.87	332	319	324	1
	ACH9-22	0.863	0.046	0.0718	0.0022	13.9276	0.42675	0.0871	0.0038	447	13	1239	82	618	24	63.9225	452	342	621	1
	ACH9-23	5.82	0.51	0.116	0.0051	8.62069	0.379013	0.349	0.02	705	29	3574	98	1843	79	80.2742	533	542	5175	1
	ACH9-24	2.02	0.14	0.0794	0.0027	12.5945	0.428275	0.18	0.01	493	16	2570	120	1078	52	80.8171	322	273	625	2
	ACH9-25	10.9	1.1	0.153	0.011	6.53595	0.469905	0.509	0.018	900	60	4256	55	2349	88	78.8534	499	1883	4884	1
	ACH9-26	4.51	0.36	0.1056	0.0045	9.4697	0.403538	0.3	0.015	645	26	3400	79	1638	64	81.0294	407	395	2248	1
	ACH9-27	6.21	0.22	0.3071	0.0099	3.25627	0.104972	0.1477	0.0041	1725	48	2299	49	1998	31	24.9674	74	93	557	1
	ACH9-28	1.892	0.093	0.0797	0.0026	12.5471	0.409314	0.1672	0.006	494	16	2481	63	1055	34	80.0887	628	741	1579	1
	ACH9-29	0.588	0.02	0.0751	0.0024	13.3156	0.425531	0.0568	0.0015	467	14	465	59	470	13	-0.430108	261	179	208	1
	ACH9-30	1.575	0.09	0.0996	0.0033	10.0402	0.332656	0.1149	0.0057	612	19	1849	91	956	36	66.901	70	243	391	0
	ACH9-31	0.686	0.037	0.0656	0.0021	15.2439	0.487991	0.0761	0.0036	410	13	1048	93	525	22	60.8779	527	364	432	1
	ACH9-32	2.92	0.17	0.0827	0.0029	12.0919	0.424021	0.2441	0.0092	512	17	3098	60	1351	43	83.4732	455	359	1624	1
	ACH9-33	4.32	0.35	0.0998	0.004	10.02	0.401605	0.294	0.017	612	23	3439	95	1621	70	82.2041	476	377	2433	1
	ACH9-34	5.1	0.5	0.1098	0.0051	9.10747	0.423025	0.318	0.018	669	29	3468	91	1749	77	80.7093	388	232	2260	2
	ACH9-35	1.284	0.086	0.077	0.0025	12.987	0.421656	0.1195	0.0069	478	15	1890	100	826	37	74.709	281	159	432	2
	ACH9-36	0.553	0.02	0.07	0.0023	14.2857	0.469388	0.0573	0.0017	436	14	483	67	446	13	9.73085	340	303	359	1
	ACH9-37	83	22	0.85	0.22	1.17647	0.304498	0.53	0.026	2340	450	4256	78	3040	230	45.0188	275	222	3178	1
	ACH9-38	52	13	0.464	0.097	2.15517	0.450543	0.662	0.018	1850	220	4588	69	3190	170	59.6774	358	282	6003	2
	ACH9-39	64	20	0.62	0.18	1.6129	0.468262	0.521	0.031	1900	340	4190	100	2890	220	54.6539	334	190	4117	2
	ACH9-40	1.194	0.048	0.0676	0.0022	14.7929	0.481426	0.1276	0.0041	422	13	2046	54	794	22	79.3744	1087	1316	2233	1
OXCOPJG0054	T14A-01	0.692	0.036	0.0705	0.0026	14.1844	0.523112	0.0705	0.0028	439	15	955	81	528	21	54.0314	430	546	616	0.803
	T14A-02	3.73	0.12	0.2462	0.0088	4.06174	0.14518	0.1115	0.0028	1419	45	1824	44	1575	26	22.2039	284	348	1482	0.804
	T14A-03	0.441	0.019	0.0473	0.0016	21.1416	0.715151	0.0667	0.0023	298	10	810	72	369	13	63.2099	1654	994	718	1.559
	T14A-04	0.544	0.015	0.0652	0.0015	15.3374	0.352855	0.0607	0.0014	406.6	9.1	615	48	442.1	9.9	33.8862	644	476	512	1.395
	T14A-05	0.531	0.032	0.0707	0.0022	14.1443	0.440133	0.0548	0.0034	440	13	390	120	440	20	-12.8205	236	120	151	1.916
	T14A-06	1.048	0.035	0.0492	0.0019	20.3252	0.784916	0.1537	0.0045	310	11	2370	52	724	17	86.9198	791	987	1161	0.796
	T14A-07	1.001	0.044	0.0571	0.0018	17.5131	0.552078	0.131	0.0069	358	11	2032	95	697	22	82.3819	1030	1062	1043	0.936
	T14A-08	0.506	0.015	0.0661	0.0015	15.1286	0.343311	0.0564	0.0016	411.2	9.1	442	61	417	10	6.96833	405	584	715	0.6962
	T14A-09	0.544	0.025	0.0695	0.0024	14.3885	0.496869	0.0569	0.0022	432	15	480	79	438	16	10	760	1013	1327	0.738
	T14A-10	0.581	0.025	0.0521	0.0021	19.1939	0.773649	0.0809	0.0023	327	13	1220	57	466	16	73.1967	1985	1428	1623	1.382
	T14A-11	0.647	0.036	0.0691	0.0033	14.4718	0.691127	0.0666	0.003	430	20	807	94	502	22	46.7162	834	970	1290	0.961
	T14A-12	2.146	0.098	0.1526	0.0068	6.55308	0.292011	0.1019	0.0026	914	38	1650	49	1159	31	44.6061	612	436	1151	1.464
	T14A-14	0.568	0.028	0.0698	0.0025	14.3267	0.513132	0.0589	0.0022	434	15	551	81	453	18	21.2341	794	368	509	2.353
	T14A-15	0.418	0.055	0.0499	0.0064	20.0401	2.57027	0.0962	0.005	299	36	1410	120	384	38	78.7943	1300	1760	596	0.68
	T14A-16	0.44	0.071	0.065	0.0051	15.3846	1.2071	0.0556	0.0073	405	30	370	260	387	47	-9.45946	187	172	108	1.437
	T14A-17	0.739	0.037	0.0666	0.0023	15.015	0.518537	0.08	0.0047	415	14	1150	120	563	21	63.913	569	325	483	1.633
	T14A-18	0.662	0.037	0.066	0.0027	15.1515	0.619835	0.0735	0.004	411	16	910	120	503	24	54.8352	840	597	629	1.298
	T14A-19	0.544	0.031	0.0682	0.0027	14.6628	0.58049	0.057	0.0022	425	16	470	82	437	20	9.57447	576	903	1128	0.648
	T14A-20	0.529	0.021	0.0671	0.0022	14.9031	0.488627	0.0572	0.0018	419	13	469	66	428	14	10.661	984	360	429	2.913
	T14A-21	0.739	0.027	0.0516	0.0018	19.3798	0.676041	0.1019	0.0028	324	11	1650	50	559	16	80.3636	877	863	742	1.01
	T14A-22	0.57	0.031	0.02	0.001	50	2.5	0.2006	0.0038	127.4	6.5	2831	30	446	21	95.4998	2250	4110	1582	0.732
	T14A-23	0.711	0.059	0.0622	0.0029	16.0772	0.749579	0.0804	0.0071	389	18	1210	170	543	33	67.8512	145	218	146	0.653
	T14A-24	0.92	0.031	0.0657	0.0017	15.2207	0.393838	0.1031	0.003	410	10	1664	57	663	17	75.3606	736	490	895	1.496
	T14A-25	3.21	0.31	0.0672	0.0077	14.881	1.70511	0.376	0.013	414	46	3763	63	1384	67	88.9981	490	660	1320	0.589
	T14A-26	0.847	0.049	0.0676	0.0047	14.7929	1.0285	0.0941	0.0028	419	28	1501	57	618	27	72.0853	940	461	678	1.889
	T14A-27	0.809	0.018	0.0421	0.00094	23.753	0.530351	0.1414	0.0024	265.7	5.8	2236	31	600	10	88.1172	1984	992	1883	1.93
	T14A-28	0.842	0.03	0.0649	0.0017	15.4083	0.403608	0.093	0.0033	405	10	1479	66	619	17	72.6166	397.1	267	437	1.463
	T14A-29	1.435	0.057	0.0956	0.0033	10.4603	0.361076	0.108	0.003	592	19	1747	50	913	24	66.1133	1695	761	1580	2.279
	T14A-30	30.23	0.9	0.2719	0.0073	3.67782	0.0987426	0.7993	0.0097	1547	37	4961	22	3502	29	68.8168	1880	2440	83300	1.127
	T14A-31	1.109	0.04	0.0701	0.0023	14.2653	0.46805	0.1143	0.0028	436	14	1851	44	754	19	76.4452	927	708	1526	1.292
	T14A-32	0.588	0.023	0.0695	0.0022	14.3885	0.455463	0.0597	0.002	433	13	589	73	470	15	26.4856	677	646	825	1.093
	T14A-33	6.85	0.44	0.1025	0.0034	9.7561	0.323617	0.452	0.017	629	20	4056	58	2036	59	84.4921	798	772	6540	1.131
	T14A-34	0.615	0.03	0.0768	0.0028	13.0208	0.474718	0.0586	0.0027	477	17	520	100	484	19	8.26923	383.4	279.3	374	1.441
	T14A-35	0.879	0.024	0.0891	0.0023	11.2233	0.289716	0.0711	0.0017	550	14	962	48	644	13	42.8274	790	484	799	1.775
	T14A-36	8.19	0.24	0.0944	0.0028	10.5932	0.314206	0.616	0.01	581	16	4546	24	2247	27	87.2195	2680	1335	28500	2.133
	T14A-37	1.176	0.07	0.0676	0.003	14.7929	0.65649	0.1246	0.0061	421	18	1986	85	781	33	78.8016	1103	478	1431	2.453
	T14A-38	0.579	0.027	0.0742	0.0034	13.4771	0.617549	0.0566	0.0029	461	20	460	110	464	17	-0.217391	603	1064	1330	0.624
	T14A-39	0.99	0.1	0.0662	0.0027	15.1057	0.616095	0.11	0.011	413	16	1640	150	681	47	74.8171	760	1015	1453	0.801
	T14A-40	2.26	0.2	0.067	0.0047	14.9254	1.047	0.233	0.01	416	28	3103	74	1139	55	86.5936	570	487	1510	1.417
	T14A-41	2.019	0.086	0.1846	0.0049	5.41712	0.143791	0.0783	0.0029	1090	27	1133	69	1109	28	3.79523	136.6	156.6	460	0.926
	T14A-42	0.607	0.025	0.0668	0.0018	14.9701	0.403385	0.0653	0.0023	416	11	775	76	481	15	46.3226	551	282	348	1.966
	T14A-43	1.309	0.084	0.0652	0.0019	15.3374	0.446949	0.1439	0.0086	409	12	2220	110	844	38	81.5766	696	483	1189	1.512
SW013	SW013_01.d	10.88	0.35	0.406	0.01	2.46305	0.0606664	0.1934	0.0047	2198	48	2771	39	2513	29	20.6785	831	22	276	37
	SW013_02.d	3.2	0.11	0.2473	0.007	4.04367	0.114459	0.0934	0.0024	1427	35	1494	48	1459	26	4.48461	532	455	1743	1
	SW013_03.d	0.688	0.024	0.052	0.0024	19.2308	0.887574	0.0977	0.0042	326	15	1547	82	531	15	78.927	1075	630	674	2
	SW013_04.d	2.179	0.078	0.1976	0.0054	5.06073	0.138299	0.0795	0.0023	1162	29	1183	57	1173	25	1.77515	313	192	627	2
	SW013_05.d	3.61	0.13	0.2595	0.0079	3.85357	0.117315	0.1016	0.0028	1486	40	1648	50	1552	29	9.8301	630	68	328	9
	SW013_06.d	17.9	0.68	0.53	0.016	1.88679	0.0569598	0.245	0.0063	2741	66	3154	42	2980	37	13.0945	262	64	511	4
	SW013_07.d	2.34	0.1	0.1896	0.0069	5.27426	0.191943	0.0894	0.0036	1118	37	1403	82	1223	31	20.3136	74	30	95	2
	SW013_08.d	0.542	0.037	0.0695	0.0023	14.3885	0.476166	0.0565	0.0038	433	14	450	140	444	23	3.77778	71	16	19	4
	SW013_09.d	1.244	0.052	0.1064	0.005	9.3985	0.441659	0.086	0.0026	650	29	1327	59	819	23	51.0173	564	272	446	2
	SW013_10.d	1.871	0.069	0.168	0.0049	5.95238	0.173611	0.0807	0.0025	1001	27	1202	60	1071	25	16.7221	428	90	201	5
	SW013_100.d	0.592	0.054	0.0745	0.0039	13.4228	0.702671	0.0584	0.0039	463	23	500	140	473	34	7.4	96	54	59	2
	SW013_101.d	1.39	0.12	0.1402	0.0083	7.13267	0.422262	0.073	0.0027	844	47	1021	76	877	52	17.3359	511	115	342	5
	SW013_102.d	0.66	0.05	0.0793	0.0041	12.6103	0.651985	0.0609	0.0025	492	24	623	91	514	30	21.0273	280	194	225	2
	SW013_103.d	1.89	0.14	0.1829	0.0092	5.46747	0.275018	0.076	0.0031	1084	51	1092	84	1074	49	0.732601	101	72	220	2
	SW013_104.d	0.846	0.064	0.1021	0.0052	9.79432	0.498829	0.0615	0.0025	626	31	637	87	631	36	1.72684	258	34	58	8
	SW013_105.d	0.831	0.062	0.0872	0.0048	11.4679	0.63126	0.0699	0.0028	539	28	915	84	613	34	41.0929	644	307	372	2
	SW013_106.d	0.915	0.076	0.1096	0.006	9.12409	0.499494	0.0621	0.0032	670	35	660	110	660	39	-1.51515	245	201	308	1
	SW013_11.d	5.68	0.18	0.3542	0.0088	2.82326	0.0701432	0.1153	0.0029	1954	42	1884	45	1929	28	-3.7155	499	292	1656	2
	SW013_12.d	0.622	0.024	0.076	0.002	13.1579	0.34626	0.0599	0.002	473	12	592	74	491	15	20.1014	600	77	113	7
	SW013_13.d	0.565	0.022	0.0727	0.002	13.7552	0.378409	0.0563	0.0018	452	12	450	72	454	14	-0.444444	448	195	236	2
	SW013_14.d	0.727	0.025	0.0716	0.0027	13.9665	0.526669	0.0749	0.0027	446	16	1056	72	555	14	57.7652	1162	213	309	6
	SW013_15.d	0.792	0.032	0.0999	0.0027	10.01	0.270541	0.0576	0.0019	613	16	507	69	596	18	-20.9073	241	144	234	2
	SW013_16.d	0.83	0.03	0.0752	0.0022	13.2979	0.389033	0.0792	0.0023	467	13	1175	59	613	17	60.2553	1058	428	667	2
	SW013_17.d	3.05	0.1	0.2248	0.0066	4.4484	0.130602	0.0984	0.0026	1307	35	1590	49	1421	27	17.7987	572	376	1233	2
	SW013_18.d	1.939	0.065	0.1791	0.0046	5.58347	0.143406	0.0783	0.0021	1062	25	1153	53	1096	23	7.89245	424	302	904	1
	SW013_19.d	19.17	0.64	0.566	0.016	1.76678	0.0499444	0.245	0.0062	2890	64	3153	41	3051	33	8.34126	110	98	839	1
	SW013_20.d	1.138	0.04	0.0903	0.0033	11.0742	0.404705	0.0911	0.0028	559	20	1438	58	770	19	61.1266	1317	970	1176	1
	SW013_21.d	3.01	0.1	0.2398	0.0063	4.17014	0.109558	0.0914	0.0024	1385	33	1452	49	1411	26	4.61433	258	77	316	3
	SW013_22.d	1.227	0.047	0.1143	0.0034	8.74891	0.260247	0.0774	0.0022	697	20	1127	59	813	22	38.1544	507	133	182	4
	SW013_23.d	0.88	0.064	0.087	0.0043	11.4942	0.568107	0.073	0.0027	538	25	1015	76	640	35	46.9951	1297	465	710	3
	SW013_24.d	0.838	0.064	0.0919	0.0051	10.8814	0.603864	0.0664	0.0028	566	30	822	87	619	35	31.1436	565	311	399	2
	SW013_25.d	1.152	0.087	0.1016	0.0052	9.84252	0.503751	0.0833	0.0033	623	31	1275	76	778	40	51.1373	714	287	391	3
	SW013_26.d	2.05	0.16	0.189	0.01	5.29101	0.279947	0.0779	0.0032	1116	57	1141	80	1132	51	2.19106	176	90	261	2
	SW013_27.d	0.856	0.064	0.0934	0.0047	10.7066	0.538771	0.0665	0.0026	575	28	809	83	629	34	28.9246	482	83	169	6
	SW013_28.d	1.034	0.076	0.1237	0.0061	8.08407	0.398649	0.061	0.0026	751	35	637	92	721	37	-17.8964	228	103	224	2
	SW013_29.d	2.09	0.15	0.1975	0.0096	5.06329	0.246114	0.0775	0.0027	1161	52	1138	69	1149	49	-2.02109	377	175	601	2
	SW013_30.d	2.36	0.17	0.21	0.01	4.7619	0.226757	0.0819	0.0029	1228	55	1240	70	1229	53	0.967742	277	43	146	11
	SW013_31.d	0.616	0.047	0.0786	0.0038	12.7226	0.61509	0.0574	0.0027	488	23	490	100	486	29	0.408163	236	166	234	1
	SW013_32.d	1.91	0.14	0.1841	0.0091	5.43183	0.268493	0.0753	0.003	1091	51	1075	81	1084	49	-1.48837	145	74	226	2
	SW013_33.d	3.51	0.26	0.237	0.012	4.21941	0.213641	0.1085	0.0037	1371	62	1775	60	1532	58	22.7606	530	276	1055	2
	SW013_34.d	3.01	0.23	0.209	0.013	4.78469	0.297612	0.1049	0.0034	1221	67	1712	60	1401	59	28.6799	996	150	683	6
	SW013_35.d	1.83	0.14	0.1776	0.009	5.63063	0.285336	0.0755	0.0027	1054	49	1085	67	1053	49	2.85714	430	90	391	5
	SW013_36.d	1.88	0.13	0.1695	0.0083	5.8997	0.288894	0.0801	0.0028	1009	46	1207	70	1074	49	16.4043	820	232	693	3
	SW013_37.d	0.778	0.058	0.0864	0.0044	11.5741	0.58942	0.0652	0.0026	534	26	768	84	583	33	30.4688	517	174	314	3
	SW013_38.d	1.61	0.12	0.1646	0.0083	6.07533	0.30635	0.0701	0.0025	982	46	931	71	972	46	-5.47798	247	127	359	2
	SW013_39.d	1.49	0.12	0.1432	0.0082	6.98324	0.399878	0.0757	0.0035	862	46	1081	98	925	47	20.259	598	147	365	4
	SW013_40.d	0.731	0.054	0.0909	0.0045	11.0011	0.544609	0.058	0.0025	561	26	522	95	555	32	-7.47126	224	74	127	3
	SW013_41.d	0.837	0.062	0.1036	0.005	9.65251	0.465855	0.0596	0.0024	636	29	577	87	618	35	-10.2253	416	289	558	1
	SW013_42.d	0.606	0.079	0.076	0.0046	13.1579	0.796399	0.0565	0.0066	472	28	430	250	487	51	-9.76744	46	11	13	4
	SW013_43.d	1.103	0.085	0.0906	0.0049	11.0375	0.596952	0.0884	0.0034	558	29	1379	75	753	40	59.5359	629	196	503	3
	SW013_44.d	0.798	0.061	0.0594	0.0043	16.835	1.2187	0.0999	0.0046	371	26	1595	94	593	33	76.7398	691	1229	989	1
	SW013_45.d	0.762	0.057	0.0929	0.0047	10.7643	0.544586	0.0596	0.0025	573	28	571	92	575	32	-0.350263	300	271	482	1
	SW013_46.d	0.712	0.061	0.0824	0.0046	12.1359	0.677491	0.0629	0.0036	510	28	710	130	543	36	28.169	171	167	273	1
	SW013_47.d	0.841	0.061	0.103	0.005	9.70874	0.471298	0.0595	0.0021	632	30	586	75	619	34	-7.84983	790	38	74	19
	SW013_48.d	11.3	1.5	0.457	0.041	2.18818	0.196314	0.195	0.013	2420	180	2770	110	2600	120	12.6354	27	3	39	9
	SW013_49.d	0.917	0.067	0.062	0.0031	16.129	0.806452	0.1085	0.0041	388	19	1784	63	661	36	78.2511	1002	1729	1780	1
	SW013_50.d	0.832	0.067	0.0984	0.005	10.1626	0.516392	0.0609	0.003	606	30	600	110	615	37	-1	109	88	170	1
	SW013_51.d	2.18	0.15	0.198	0.0095	5.05051	0.242322	0.0804	0.0027	1164	51	1206	67	1172	50	3.48259	850	100	367	8
	SW013_52.d	0.717	0.053	0.0894	0.0045	11.1857	0.563038	0.0581	0.0026	552	27	535	97	549	32	-3.17757	307	131	224	2
	SW013_53.d	3.82	0.28	0.272	0.014	3.67647	0.18923	0.1027	0.0037	1554	69	1678	67	1600	60	7.38975	151	89	449	2
	SW013_54.d	1.09	0.084	0.1227	0.0068	8.14996	0.451668	0.0645	0.0024	745	39	746	77	744	41	0.134048	505	25	70	19
	SW013_55.d	0.727	0.053	0.064	0.0031	15.625	0.756836	0.0834	0.0032	400	19	1269	76	554	31	68.4791	1276	203	467	6
	SW013_56.d	1.221	0.089	0.0871	0.0044	11.4811	0.579985	0.1024	0.0036	538	26	1669	69	809	41	67.7651	1393	1289	2134	1
	SW013_57.d	1.56	0.12	0.1538	0.0082	6.50195	0.346658	0.0739	0.0033	922	46	1038	92	955	47	11.1753	176	104	336	2
	SW013_58.d	3.92	0.28	0.289	0.014	3.46021	0.167623	0.0992	0.0035	1636	72	1608	68	1617	58	-1.74129	352	256	965	1
	SW013_59.d	2.03	0.15	0.198	0.01	5.05051	0.255076	0.0746	0.0027	1165	54	1066	77	1122	50	-9.28705	191	118	400	2
	SW013_60.d	0.776	0.057	0.0709	0.0037	14.1044	0.736053	0.0796	0.0033	443	21	1190	82	586	34	62.7731	620	299	461	2
	SW013_61.d	1.71	0.12	0.1755	0.0085	5.69801	0.275972	0.0708	0.0025	1042	47	949	73	1012	46	-9.79979	350	164	517	2
	SW013_62.d	28.5	2	0.655	0.032	1.52672	0.0745877	0.316	0.01	3240	120	3551	49	3441	70	8.7581	859	505	4613	2
	SW013_63.d	3.26	0.23	0.261	0.013	3.83142	0.190837	0.0905	0.0033	1493	65	1444	70	1471	58	-3.39335	116	67	289	2
	SW013_64.d	2.23	0.16	0.206	0.01	4.85437	0.235649	0.079	0.0027	1206	54	1163	68	1189	50	-3.69733	304	151	521	3
	SW013_65.d	0.631	0.052	0.0785	0.004	12.7388	0.649114	0.0587	0.0029	488	24	530	110	499	31	7.92453	134	144	175	1
	SW013_66.d	0.731	0.052	0.09	0.0043	11.1111	0.530864	0.0591	0.0021	555	25	572	78	556	31	2.97203	580	139	229	4
	SW013_67.d	9.13	0.65	0.432	0.021	2.31481	0.112526	0.1539	0.0051	2311	96	2388	56	2355	61	3.22446	451	258	1782	2
	SW013_68.d	0.776	0.067	0.0943	0.005	10.6044	0.562272	0.0588	0.0036	581	30	540	130	581	39	-7.59259	95	84	144	1
	SW013_69.d	0.517	0.058	0.0698	0.0044	14.3267	0.903112	0.0571	0.0047	435	26	470	180	421	39	7.44681	137	40	56	3
	SW013_70.d	0.616	0.048	0.0783	0.0039	12.7714	0.636123	0.057	0.0026	486	23	480	96	488	29	-1.25	162	102	135	2
	SW013_71.d	0.785	0.059	0.0962	0.005	10.395	0.540281	0.0592	0.0025	592	29	579	98	586	34	-2.24525	201	89	152	2
	SW013_72.d	0.527	0.038	0.0479	0.0024	20.8768	1.04602	0.0807	0.0029	301	15	1213	70	430	25	75.1855	1150	810	605	1
	SW013_73.d	0.646	0.059	0.0809	0.0048	12.3609	0.733406	0.0576	0.0044	501	28	510	160	503	36	1.76471	128	88	116	1
	SW013_74.d	0.831	0.063	0.0913	0.0046	10.9529	0.551844	0.0664	0.0029	563	27	822	89	615	34	31.5085	801	328	564	2
	SW013_75.d	2.36	0.19	0.171	0.011	5.84795	0.376184	0.0984	0.0033	1014	59	1592	61	1228	59	36.3065	715	161	654	4
	SW013_76.d	0.592	0.044	0.0516	0.0027	19.3798	1.01406	0.0829	0.0041	324	17	1271	97	471	28	74.5083	392	570	408	1
	SW013_77.d	0.791	0.061	0.0844	0.0045	11.8483	0.631724	0.0677	0.0033	522	27	870	110	591	35	40	393	134	142	3
	SW013_78.d	2.58	0.2	0.235	0.012	4.25532	0.217293	0.0806	0.0031	1358	62	1203	76	1296	59	-12.8845	166	66	253	2
	SW013_79.d	0.793	0.062	0.0986	0.0048	10.142	0.493728	0.0587	0.0026	606	28	546	96	593	35	-10.989	146	150	255	1
	SW013_80.d	3.78	0.28	0.283	0.014	3.53357	0.174806	0.0977	0.0039	1606	71	1579	72	1585	59	-1.70994	73	64	295	1
	SW013_81.d	19	1.3	0.471	0.023	2.12314	0.103678	0.2926	0.0099	2490	100	3431	51	3038	68	27.4264	196	74	664	3
	SW013_82.d	0.769	0.058	0.0648	0.0034	15.4321	0.809709	0.0864	0.0044	405	21	1325	99	579	33	69.434	911	270	458	4
	SW013_83.d	1.98	0.18	0.1767	0.0095	5.65931	0.304264	0.0823	0.005	1048	52	1240	120	1095	58	15.4839	51	30	85	2
	SW013_84.d	0.66	0.053	0.0863	0.0047	11.5875	0.631068	0.0547	0.0029	533	28	400	110	513	32	-33.25	206	153	222	1
	SW013_85.d	0.538	0.054	0.0697	0.0047	14.3472	0.967458	0.0556	0.0056	434	28	410	210	435	35	-5.85366	105	55	57	2
	SW013_86.d	0.561	0.053	0.075	0.004	13.3333	0.711111	0.0559	0.004	468	25	430	150	452	35	-8.83721	118	49	54	2
	SW013_87.d	0.514	0.067	0.0696	0.005	14.3678	1.03217	0.0558	0.0051	434	30	420	190	423	44	-3.33333	129	37	46	4
	SW013_88.d	0.937	0.067	0.1113	0.0054	8.98473	0.435917	0.0612	0.0021	680	31	641	76	672	35	-6.08424	655	298	533	2
	SW013_89.d	2	0.15	0.1936	0.0094	5.16529	0.250794	0.0752	0.003	1141	51	1077	83	1118	52	-5.94243	107	81	244	1
	SW013_90.d	0.562	0.043	0.071	0.0035	14.0845	0.694307	0.0567	0.0025	442	21	459	97	451	28	3.7037	444	284	309	2
	SW013_91.d	5.71	0.4	0.353	0.017	2.83286	0.136427	0.1173	0.0039	1949	82	1916	59	1933	62	-1.72234	390	107	559	4
	SW013_92.d	0.806	0.065	0.1004	0.0052	9.96016	0.515865	0.0588	0.003	616	30	560	120	599	36	-10	118	106	169	1
	SW013_93.d	2.93	0.22	0.248	0.012	4.03226	0.195109	0.0861	0.0034	1432	64	1329	76	1390	56	-7.75019	71	61	230	1
	SW013_94.d	3.96	0.3	0.302	0.015	3.31126	0.164466	0.0944	0.0043	1701	75	1534	85	1622	62	-10.8866	47	65	301	1
	SW013_95.d	14.3	1	0.58	0.029	1.72414	0.0862069	0.1795	0.0058	2950	120	2646	54	2766	69	-11.489	262	70	506	6
	SW013_96.d	2.1	0.16	0.2	0.01	5	0.25	0.0765	0.0031	1177	54	1097	83	1147	52	-7.29262	105	79	242	1
	SW013_97.d	1.82	0.13	0.175	0.009	5.71429	0.293878	0.0754	0.0026	1038	50	1080	68	1051	48	3.88889	465	145	397	3
	SW013_98.d	0.861	0.079	0.1019	0.0061	9.81354	0.587464	0.0615	0.0046	625	36	640	160	623	43	2.34375	44	51	79	1
	SW013_99.d	0.658	0.059	0.0834	0.0049	11.9904	0.704472	0.0573	0.0036	516	29	490	130	510	36	-5.30612	158	126	161	1
SW026	SW026-01.d	0.516	0.035	0.0682	0.0044	14.6628	0.945984	0.05536	0.00099	425	26	424	41	423	22	-0.235849	4829	86	34	47
	SW026-02.d	2.24	0.13	0.0762	0.0036	13.1234	0.620001	0.2104	0.0082	474	21	2910	100	1193	50	83.7113	25670	1853	1338	4
	SW026-03.d	1.75	0.12	0.0808	0.0042	12.3762	0.643319	0.1534	0.0054	502	25	2366	65	1011	44	78.7828	5026	325	260	6
	SW026-04.d	0.555	0.034	0.0702	0.0034	14.245	0.689929	0.0571	0.0016	437	21	472	57	447	21	7.41525	2951	236	49	7
	SW026-05.d	0.595	0.035	0.0763	0.0038	13.1062	0.652731	0.0568	0.0018	474	23	474	60	474	21	0	531	136	64	3
	SW026-06.d	0.771	0.041	0.0673	0.0034	14.8588	0.750669	0.0824	0.0029	420	20	1246	60	580	22	66.2921	2026	218	311	9
	SW026-07.d	0.538	0.031	0.0704	0.0036	14.2045	0.726369	0.0556	0.0012	439	22	423	46	438	20	-3.78251	830	148	107	6
	SW026-08.d	0.83	0.12	0.0654	0.0033	15.2905	0.77154	0.093	0.0094	408	20	1490	110	615	48	72.6174	1260	325	452	4
	SW026-09.d	0.568	0.031	0.0735	0.0036	13.6054	0.666389	0.056	0.0016	457	22	425	57	455	20	-7.52941	217	112	128	2
	SW026-10.d	0.56	0.17	0.072	0.012	13.8889	2.31481	0.0569	0.0029	446	67	495	76	454	59	9.89899	633	129	135	5
	SW026-11.d	0.979	0.065	0.0804	0.0038	12.4378	0.587857	0.0876	0.0044	498	23	1365	74	694	30	63.5165	902	254	606	4
	SW026-12.d	0.509	0.027	0.0672	0.0032	14.881	0.708617	0.0553	0.0011	419	19	415	45	417	18	-0.963855	457	60	64	8
	SW026-13.d	0.74	0.14	0.0846	0.0047	11.8203	0.656685	0.0638	0.0069	524	27	720	120	559	50	27.2222	329	258	375	1
	SW026-14.d	0.545	0.031	0.0721	0.0037	13.8696	0.711756	0.0556	0.0012	449	22	424	47	443	20	-5.89623	488	313	355	2
	SW026-15.d	1.77	0.14	0.079	0.0036	12.6582	0.576831	0.163	0.012	490	22	2478	78	1035	42	80.226	2051	159	2475	13
	SW026-16.d	0.547	0.033	0.0709	0.0036	14.1044	0.71616	0.0557	0.0012	442	22	422	46	442	20	-4.73934	690	31	36	24
	SW026-17.d	3.67	0.22	0.266	0.015	3.7594	0.211996	0.0991	0.0024	1519	77	1609	51	1564	59	5.59354	233	229	1003	1
	SW026-18.d	0.735	0.078	0.0707	0.0039	14.1443	0.780236	0.0762	0.0066	440	24	1085	95	560	37	59.447	376	48	105	8
	SW026-19.d	7.45	0.43	0.1039	0.0051	9.62464	0.472432	0.514	0.014	637	30	4263	42	2158	51	85.0575	2633	771	19506	4
	SW026-20.d	0.6	0.074	0.073	0.0042	13.6986	0.78814	0.0608	0.0035	454	25	630	85	478	37	27.9365	974	273	338	4
	SW026-21.d	0.619	0.032	0.0792	0.0037	12.6263	0.589863	0.0567	0.0012	491	22	481	45	489	20	-2.079	699	121	137	6
	SW026-22.d	0.737	0.046	0.0922	0.0045	10.846	0.529359	0.0581	0.0017	568	26	535	49	561	25	-6.16822	1590	451	105	12
	SW026-23.d	0.608	0.049	0.0717	0.0035	13.947	0.680816	0.0615	0.0029	446	21	633	82	482	28	29.5419	272	593	136	2
	SW026-24.d	0.566	0.03	0.074	0.0035	13.5135	0.639153	0.0553	0.0013	460	21	424	53	456	19	-8.49057	510	230	54	6
	SW026-25.d	0.642	0.033	0.0726	0.0034	13.7741	0.645068	0.064	0.0013	452	21	739	44	504	20	38.8363	728	452	191	4
	SW026-26.d	0.538	0.028	0.0706	0.0034	14.1643	0.682134	0.0551	0.0012	441	20	405	49	438	19	-8.88889	535	384	154	3
	SW026-27.d	2.24	0.11	0.0592	0.0028	16.8919	0.798941	0.2739	0.005	371	17	3328	28	1193	34	88.8522	6257	319	8676	33
	SW026-28.d	0.554	0.03	0.0709	0.0032	14.1044	0.636587	0.0565	0.0018	441	20	461	58	448	19	4.33839	522	93	79	8
	SW026-29.d	0.73	0.04	0.0693	0.0033	14.43	0.687144	0.0762	0.0022	432	20	1085	57	554	23	60.1843	260	165	163	2
	SW026-30.d	0.546	0.029	0.0699	0.0033	14.3062	0.675398	0.0565	0.0015	436	19	469	50	443	19	7.03625	1070	51	55	23
	SW026-31.d	0.616	0.032	0.079	0.0037	12.6582	0.592854	0.0565	0.0015	490	22	449	58	486	20	-9.1314	165	64	86	2
	SW026-32.d	11.01	0.55	0.47	0.022	2.12766	0.0995926	0.1703	0.0028	2485	96	2561	27	2524	46	2.96759	1109	350	3042	3
	SW026-33.d	3.78	0.2	0.0803	0.0038	12.4533	0.589322	0.3433	0.0062	498	23	3679	27	1590	41	86.4637	1016	197	3532	5
	SW026-34.d	0.638	0.036	0.0711	0.0033	14.0647	0.652792	0.0651	0.0017	443	20	775	47	501	22	42.8387	579	126	231	5
	SW026-35.d	0.989	0.049	0.0927	0.0041	10.7875	0.477116	0.0774	0.0017	571	25	1123	51	698	27	49.1541	338	46	171	8
	SW026-36.d	0.566	0.03	0.0725	0.0034	13.7931	0.646849	0.056	0.0012	451	21	456	47	456	19	1.09649	472	52	68	10
	SW026-37.d	0.552	0.036	0.0723	0.0041	13.8313	0.784345	0.0554	0.0012	450	24	422	45	445	22	-6.63507	493	61	65	9
	SW026-38.d	0.713	0.038	0.0713	0.0033	14.0252	0.649135	0.0732	0.0019	444	20	1020	52	551	23	56.4706	889	208	365	5
	SW026-39.d	0.577	0.03	0.0751	0.0036	13.3156	0.638297	0.0559	0.0011	467	21	454	47	463	19	-2.86344	416	55	57	9
	SW026-40.d	0.579	0.033	0.0738	0.0033	13.5501	0.6059	0.0573	0.0017	459	20	497	52	464	20	7.64588	1057	90	129	13
	SW026-41.d	0.6	0.031	0.0741	0.0034	13.4953	0.619216	0.0587	0.0014	461	20	542	51	476	20	14.9446	276	88	163	4
	SW026-42.d	0.554	0.028	0.0714	0.0033	14.0056	0.647318	0.0557	0.0012	445	20	439	50	447	18	-1.36674	425	30	50	12
	SW026-43.d	1.002	0.069	0.0776	0.0038	12.8866	0.631045	0.0906	0.0036	481	23	1388	82	689	35	65.3458	682	133	459	7
ACH11	ACH11A-01	1820	320	15.8	2.7	0.0632911	0.0108156	0.836	0.014	13100	1200	5045	31	6480	240	-159.663	6	1	11896	9
	ACH11A-02	5.08	0.27	0.0892	0.0049	11.2108	0.615838	0.419	0.03	552	29	3950	100	1836	49	86.0253	9	0	51	-51869
	ACH11A-03	1.25	0.15	0.0633	0.004	15.7978	0.998281	0.159	0.023	394	24	2020	250	785	73	80.495	6	0	7	-44194
	ACH11A-04	8.44	0.7	0.1329	0.0068	7.52445	0.384998	0.424	0.02	799	38	3917	83	2164	83	79.6017	864	131	9404	7
	ACH11A-05	9.74	0.77	0.1451	0.007	6.8918	0.332478	0.456	0.021	871	40	4083	72	2309	83	78.6676	1051	162	11820	6
	ACH11A-06	0.758	0.033	0.0719	0.0024	13.9082	0.464252	0.0754	0.0022	447	14	1045	53	566	15	57.2249	601	129	291	5
	ACH11A-07	19.79	0.54	0.587	0.019	1.70358	0.0551413	0.2435	0.0034	2973	77	3142	22	3073	30	5.37874	370	456	3502	1
	ACH11A-08	1.91	0.14	0.107	0.0037	9.34579	0.323172	0.1276	0.0074	655	22	2000	100	1067	48	67.25	206	452	1066	0
	ACH11A-09	34.2	8.4	0.382	0.08	2.6178	0.548231	0.424	0.037	1560	230	3430	180	2370	210	54.519	370	172	5526	2
	ACH11A-10	47.7	8.1	0.475	0.072	2.10526	0.319114	0.588	0.03	2170	260	4487	85	3290	200	51.6381	176	237	2781	1
	ACH11A-11	0.517	0.033	0.0658	0.0025	15.1976	0.577415	0.057	0.0036	411	15	440	130	421	22	6.591	152	185	210	1
	ACH11A-12	136	27	1.44	0.27	0.694444	0.130208	0.519	0.033	4360	620	4160	120	3600	280	-4.80769	1067	924	8172	2
	ACH11A-13	115	25	1.11	0.23	0.900901	0.186673	0.501	0.034	3620	580	4000	140	3440	280	9.5	854	686	5137	2
	ACH11A-14	68	9.9	0.648	0.087	1.54321	0.20719	0.71	0.015	2730	220	4759	34	3930	110	42.635	263	374	10265	1
	ACH11A-15	5.74	0.41	0.1125	0.0045	8.88889	0.355556	0.346	0.015	686	26	3639	67	1857	61	81.1487	420	622	3605	1
	ACH11A-16	2.17	0.11	0.1739	0.0075	5.75043	0.248006	0.0904	0.002	1031	42	1423	44	1166	37	27.5474	289	154	601	2
	ACH11B-01	0.639	0.03	0.0674	0.0026	14.8368	0.572339	0.0684	0.0022	420	15	864	68	500	18	51.3889	380	138	195	3
	ACH11B-02	1.628	0.095	0.1238	0.0077	8.07754	0.5024	0.0963	0.0019	746	44	1553	38	965	37	51.9639	1772	370	962	7
	ACH11B-03	0.614	0.02	0.0678	0.0022	14.7493	0.47859	0.0657	0.0016	423	13	789	53	485	12	46.3878	848	124	249	7
	ACH11B-04	3.14	0.41	0.0678	0.0049	14.7493	1.06595	0.33	0.022	421	29	3470	110	1362	86	87.8674	2323	255	6695	10
	ACH11B-05	0.541	0.019	0.0683	0.0024	14.6413	0.514482	0.0567	0.0016	426	14	466	62	440	12	8.58369	833	58	67	27
SW014-18	T14A-01.d	47.4	5.9	1.39	0.18	0.719425	0.0931629	0.2664	0.0054	4990	420	3286	31	3780	120	-51.8564	195	44	629	5
	T14A-02.d	1.731	0.086	0.1732	0.008	5.77367	0.266682	0.0725	0.0013	1030	44	994	37	1019	32	-3.62173	617	145	355	5
	T14A-03.d	4.25	0.23	0.297	0.014	3.367	0.158714	0.1043	0.002	1678	70	1700	35	1682	40	1.29412	313	189	804	2
	T14A-04.d	2.23	0.12	0.1645	0.0082	6.07903	0.303028	0.0994	0.0027	982	46	1606	46	1190	35	38.8543	2065	338	2102	6
	T14A-05.d	0.824	0.053	0.0943	0.0044	10.6044	0.4948	0.0631	0.0021	581	26	715	58	610	28	18.7413	259	248	353	1
	T14A-06.d	6.27	0.52	0.197	0.019	5.07614	0.489577	0.2287	0.0053	1161	95	3036	40	1997	59	61.7589	65	29	197	3
	T14A-07.d	1.109	0.065	0.1022	0.0046	9.78474	0.440409	0.0794	0.0029	627	27	1179	48	758	26	46.8193	419	23	138	18
	T14A-08.d	1.97	0.1	0.1835	0.0085	5.44959	0.252433	0.0777	0.0018	1086	46	1132	44	1103	35	4.0636	143	81	214	2
	T14A-09.d	0.715	0.037	0.0887	0.0041	11.274	0.521119	0.0592	0.0014	547	24	556	51	548	22	1.61871	327	226	262	2
	T14A-10.d	0.649	0.068	0.0768	0.0049	13.0208	0.830756	0.061	0.0028	477	29	635	59	507	25	24.8819	721	917	792	1
	T14A-11.d	0.794	0.04	0.0925	0.0042	10.8108	0.490869	0.0624	0.0013	570	25	691	44	595	22	17.5109	527	478	372	1
	T14A-12.d	0.744	0.088	0.0845	0.0066	11.8343	0.924337	0.0637	0.0021	523	38	729	56	564	39	28.2579	1333	221	305	7
	T14A-13.d	0.718	0.036	0.0882	0.004	11.3379	0.514189	0.0592	0.0012	545	24	573	45	550	22	4.88656	469	338	376	2
	T14A-14.d	1.4	0.79	0.148	0.011	6.75676	0.502191	0.068	0.021	888	60	880	170	890	100	-0.909091	436	89	261	5
	T14A-15.d	0.737	0.037	0.0872	0.0039	11.4679	0.512899	0.0615	0.0012	539	23	652	40	561	21	17.3313	973	316	635	3
	T14A-16.d	5.77	0.28	0.352	0.016	2.84091	0.129132	0.1188	0.0023	1945	75	1934	34	1941	42	-0.568769	102	80	554	1
	T14A-17.d	4.08	0.19	0.268	0.012	3.73134	0.167075	0.1101	0.002	1531	61	1802	31	1651	42	15.0388	359	49	326	7
	T14A-18.d	1.02	0.2	0.117	0.014	8.54701	1.02272	0.0638	0.0063	712	73	730	120	709	58	2.46575	593	338	668	2
	T14A-19.d	3.26	0.21	0.26	0.012	3.84615	0.177515	0.091	0.0032	1491	61	1441	49	1472	42	-3.46981	330	141	660	2
	T14A-20.d	1.96	0.1	0.1907	0.0087	5.24384	0.239231	0.0755	0.0017	1125	47	1064	44	1102	33	-5.73308	185	67	227	3
	T14A-21.d	0.979	0.049	0.1159	0.0055	8.62813	0.409445	0.0619	0.0011	706	32	669	38	691	25	-5.53064	669	114	223	6
	T14A-22.d	4.05	0.22	0.248	0.012	4.03226	0.195109	0.1181	0.0033	1427	61	1930	40	1640	45	26.0622	413	218	875	2
	T14A-23.d	1.997	0.097	0.1898	0.0085	5.2687	0.235954	0.0764	0.0015	1121	48	1103	41	1111	37	-1.63191	168	60	180	3
	T14A_24.d	2.012	0.08	0.1839	0.0052	5.43774	0.153759	0.0798	0.0026	1088	28	1185	67	1119	26	8.18565	270	500	1563	1
	T14A_25.d	0.626	0.025	0.0787	0.002	12.7065	0.322909	0.0569	0.002	489	12	465	77	492	16	-5.16129	415	295	444	1
	T14A_26.d	2.256	0.08	0.2093	0.0054	4.77783	0.123269	0.0776	0.0021	1230	30	1135	56	1199	25	-8.37004	297	144	542	2
	T14A_27.d	1.34	0.14	0.1005	0.0043	9.95025	0.425732	0.0965	0.0088	617	25	1400	160	829	57	55.9286	212	95	199	2
	T14A_28.d	1.36	0.051	0.1243	0.0038	8.04505	0.245947	0.0779	0.0025	755	22	1148	63	872	22	34.2334	1018	386	758	3
	T14A_29.d	0.874	0.039	0.0967	0.0027	10.3413	0.288743	0.0656	0.0027	595	16	761	80	635	21	21.8134	575	487	874	1
	T14A_30.d	1.502	0.088	0.1307	0.0049	7.65111	0.286843	0.0812	0.003	796	30	1221	71	929	38	34.8075	347	89	237	4
	T14A_31.d	4.52	0.17	0.3046	0.009	3.28299	0.0970025	0.1073	0.0033	1713	45	1758	56	1733	32	2.55973	167	39	205	4
	T14A_32.d	1.745	0.058	0.1566	0.0046	6.3857	0.187575	0.0785	0.0021	938	26	1157	53	1024	22	18.9283	1553	2076	5392	1
	T14A_33.d	2.081	0.076	0.1967	0.0052	5.08388	0.134399	0.0763	0.0023	1157	28	1106	63	1146	26	-4.61121	172	315	1056	1
	T14A_34.d	0.849	0.05	0.094	0.0035	10.6383	0.396107	0.0652	0.0036	579	21	750	120	624	29	22.8	200	77	117	3
	T14A_35.d	2.13	0.1	0.187	0.0065	5.34759	0.185879	0.0792	0.0024	1104	35	1179	63	1154	33	6.36132	647	242	803	3
	T14A_36.d	1.944	0.073	0.1824	0.0056	5.48246	0.168321	0.0751	0.002	1082	31	1069	54	1094	25	-1.21609	436	98	299	5
	T14A_37.d	0.659	0.028	0.0817	0.0024	12.2399	0.359557	0.0579	0.002	506	14	532	70	513	17	4.88722	831	306	413	3
	T14A_38.d	6.14	0.46	0.2096	0.0074	4.77099	0.168441	0.206	0.012	1225	39	2820	100	1951	56	56.5603	808	378	3450	2
	T14A_39.d	3.85	0.13	0.2784	0.0072	3.59195	0.0928954	0.0996	0.0026	1582	36	1612	49	1602	27	1.86104	294	368	1622	1
	T14A_40.d	1.246	0.061	0.1326	0.0046	7.54148	0.26162	0.0671	0.0032	802	27	840	95	820	28	4.52381	99	59	123	2
	T14A_41.d	1.013	0.059	0.106	0.0038	9.43396	0.338199	0.068	0.0024	649	22	856	72	706	29	24.1822	1399	164	340	9
	T14A_42.d	1.678	0.07	0.1663	0.006	6.01323	0.216953	0.0729	0.0019	990	33	1010	53	997	26	1.9802	969	325	810	3
	T14A_43.d	1.04	0.04	0.1031	0.0027	9.69932	0.254007	0.0731	0.0026	633	16	1015	72	723	20	37.6355	357	740	1229	0
	T14A_44.d	1.47	0.053	0.1497	0.0038	6.68003	0.169567	0.0717	0.002	901	22	965	56	916	22	6.63212	550	157	379	4
	T14A_45.d	1.005	0.04	0.0971	0.0025	10.2987	0.265156	0.0747	0.0025	598	15	1057	67	704	20	43.4248	404	1009	1460	0
	T14A_46.d	2.005	0.068	0.1892	0.0048	5.28541	0.134091	0.077	0.0019	1117	26	1116	49	1118	23	-0.0896057	1253	1007	3039	1
	T14A_47.d	0.751	0.032	0.091	0.0024	10.989	0.28982	0.0604	0.0021	561	14	598	76	567	19	6.18729	482	242	351	2
	T14A_48.d	2.048	0.069	0.1868	0.0047	5.35332	0.134693	0.0794	0.002	1104	26	1179	50	1132	22	6.36132	703	215	677	3
	T14A_49.d	1.68	0.056	0.1638	0.0045	6.10501	0.16772	0.0749	0.002	978	25	1067	53	1000	21	8.34114	1276	361	932	4
	T14A_50.d	2.8	0.16	0.226	0.011	4.42478	0.215365	0.0901	0.0027	1310	55	1422	59	1339	41	7.87623	424	37	98	10
	T14A_51.d	0.73	0.032	0.0812	0.0024	12.3153	0.363998	0.0652	0.0025	503	15	781	84	555	19	35.5954	264	121	127	2
	T14A_52.d	1.438	0.066	0.1479	0.0047	6.76133	0.214863	0.0706	0.0023	891	27	941	66	905	27	5.3135	405	147	396	3
	T14A_53.d	0.687	0.022	0.0865	0.0023	11.5607	0.307394	0.058	0.0016	535	13	534	61	530	14	-0.187266	599	270	365	2
	T14A_54.d	1.864	0.086	0.1031	0.0028	9.69932	0.263415	0.1306	0.0049	633	16	2087	65	1066	30	69.6694	2621	1178	4100	2
	T14A_55.d	0.735	0.036	0.0765	0.0024	13.0719	0.410099	0.0684	0.0027	475	15	893	83	559	20	46.8085	277	255	305	1
	T14A_56.d	1.929	0.073	0.1637	0.0043	6.10874	0.160462	0.0861	0.0026	977	24	1331	59	1089	26	26.5965	220	79	256	3
	T14A_57.d	2.06	0.13	0.0948	0.0029	10.5485	0.322687	0.1586	0.0093	584	17	2470	100	1136	45	76.3563	366	265	723	1
	T14A_58.d	1.667	0.069	0.1653	0.0052	6.04961	0.190308	0.075	0.0028	986	29	1059	75	995	27	6.8933	556	280	554	2
	T14A_59.d	1.876	0.066	0.1813	0.0051	5.51572	0.155158	0.0762	0.0023	1074	28	1103	56	1075	22	2.62919	357	139	432	4
	T14A_60.d	10.34	0.38	0.442	0.013	2.26244	0.0665425	0.1712	0.0046	2357	58	2566	44	2467	32	8.14497	382	232	837	2
	T14A_61.d	22.21	0.76	0.614	0.018	1.62866	0.0477459	0.2639	0.0067	3083	71	3269	40	3194	34	5.68981	623	385	2766	2
	T14A_62.d	6.4	0.24	0.36	0.014	2.77778	0.108025	0.1308	0.0047	1982	66	2109	62	2034	34	6.02181	186	357	1250	1
	T14A_63.d	0.718	0.035	0.0876	0.004	11.4155	0.521257	0.0587	0.0029	541	24	540	110	548	21	-0.185185	306	154	180	2
	T14A_64.d	4.85	0.16	0.3273	0.0089	3.0553	0.0830803	0.1082	0.0026	1824	43	1767	44	1792	28	-3.22581	714	402	1810	2
	T14A_65.d	2.446	0.093	0.1875	0.0056	5.33333	0.159289	0.0957	0.003	1107	30	1533	60	1256	29	27.7886	427	163	442	3
	T14A_66.d	3.79	0.18	0.292	0.012	3.42466	0.140739	0.0951	0.003	1658	59	1541	58	1588	39	-7.59247	544	339	1004	2
	T14A_67.d	1.895	0.07	0.1726	0.0052	5.79374	0.174551	0.079	0.0022	1026	28	1168	55	1078	25	12.1575	855	729	1643	1
	T14A_68.d	21.74	0.68	0.624	0.015	1.60256	0.0385232	0.2534	0.0059	3123	61	3205	37	3171	31	2.5585	687	313	2509	2
	T14A_69.d	13.9	0.46	0.529	0.013	1.89036	0.046455	0.1902	0.0046	2737	57	2745	39	2741	31	0.291439	315	199	1425	2
	T14A_70.d	4.21	0.5	0.17	0.017	5.88235	0.588235	0.188	0.025	1002	92	2750	220	1660	100	63.5636	6	3	11	2
	T14A_71.d	3.54	0.15	0.2688	0.0082	3.72024	0.113489	0.0986	0.0032	1533	42	1604	60	1540	31	4.42643	108	47	183	2
	T14A_72.d	0.664	0.028	0.0827	0.0028	12.0919	0.409399	0.0591	0.0024	512	17	558	94	518	17	8.24373	273	274	335	1
	T14A_73.d	1.413	0.058	0.1179	0.0044	8.48176	0.316537	0.0895	0.0027	718	26	1404	57	894	24	48.8604	3774	4623	5129	1
	T14A_74.d	3.06	0.2	0.1155	0.005	8.65801	0.374806	0.1903	0.008	703	29	2722	66	1393	43	74.1734	666	627	1647	1
	T14A_75.d	1.12	0.1	0.0882	0.0035	11.3379	0.449915	0.0917	0.0069	544	21	1360	150	734	45	60	92	59	104	2
	T14A_76.d	2.222	0.082	0.2014	0.0055	4.96524	0.135595	0.0819	0.0023	1182	30	1235	55	1193	25	4.2915	248	84	209	3
	T14A_77.d	0.872	0.047	0.084	0.0032	11.9048	0.453515	0.0763	0.0044	520	19	1080	120	633	26	51.8519	194	173	233	1
	T14A_78.d	1.766	0.067	0.1751	0.0052	5.71102	0.169602	0.0744	0.0022	1043	29	1049	62	1035	24	0.571973	356	127	350	3
	T14A_79.d	2.005	0.081	0.1858	0.0053	5.38213	0.153527	0.0806	0.0028	1098	29	1200	70	1115	28	8.5	225	150	421	1
	T14A_80.d	2.16	0.14	0.1861	0.0084	5.37345	0.242542	0.0868	0.004	1100	46	1344	85	1162	45	18.1548	359	506	1635	1
	T14A_81.d	0.97	0.057	0.096	0.0041	10.4167	0.444879	0.0738	0.0029	590	24	1037	80	690	31	43.1051	320	151	243	2
	T14A_82.d	2.45	0.21	0.124	0.011	8.06452	0.715401	0.157	0.011	745	61	2350	130	1227	60	68.2979	344	225	656	1
	T14A_83.d	1.73	0.13	0.0966	0.0051	10.352	0.546532	0.1293	0.0075	593	30	2070	110	1020	48	71.3527	110	59	136	2
	T14A_84.d	10.84	0.47	0.452	0.015	2.21239	0.07342	0.1732	0.0047	2406	67	2587	44	2507	40	6.99652	181	77	524	2
	T14A_85.d	4.21	0.14	0.3101	0.0083	3.22477	0.0863127	0.0992	0.0024	1740	41	1610	44	1676	28	-8.07453	995	98	399	10
	T14A_86.d	1.939	0.07	0.1817	0.005	5.50358	0.151447	0.0777	0.0021	1076	27	1132	53	1093	24	4.947	454	145	307	3
	T14A_87.d	0.641	0.028	0.0774	0.003	12.9199	0.500771	0.0599	0.0024	481	18	585	88	503	17	17.7778	928	229	287	4
	T14A_88.d	7.35	0.32	0.367	0.016	2.7248	0.118792	0.143	0.0044	2024	72	2250	53	2143	41	10.0444	238	53	298	4
	T14A_89.d	3.89	0.56	0.194	0.02	5.15464	0.531406	0.14	0.016	1150	110	2260	210	1580	110	49.115	11	4	25	3
	T14A_90.d	1.452	0.083	0.1481	0.005	6.75219	0.227961	0.0705	0.0033	890	28	962	91	906	35	7.48441	131	77	189	2
	T14A_91.d	2.73	0.57	0.151	0.025	6.62252	1.09644	0.145	0.023	890	140	2060	280	1260	160	56.7961	7	5	13	2
	T14A_92.d	1.933	0.068	0.1856	0.0047	5.38793	0.13644	0.0751	0.0022	1097	26	1069	59	1094	24	-2.61927	276	117	344	3
	T14A_93.d	21.72	0.7	0.636	0.016	1.57233	0.0395554	0.2473	0.0058	3173	64	3168	38	3172	32	-0.157828	317	205	1919	2
	T14A_94.d	3.71	0.75	0.227	0.035	4.40529	0.679229	0.123	0.021	1300	180	1860	350	1620	150	30.1075	6	4	13	1
	T14A_95.d	4.83	0.86	0.309	0.041	3.23625	0.429405	0.115	0.017	1700	200	1770	290	1680	150	3.9548	5	3	19	2
	T14A_96.d	5.04	0.22	0.32	0.011	3.125	0.107422	0.1122	0.0032	1786	55	1834	51	1825	37	2.61723	292	287	1419	1
	T14A_97.d	4.41	0.14	0.289	0.0079	3.46021	0.094587	0.1111	0.0027	1636	41	1815	45	1714	27	9.86226	935	650	2791	1
	T14A_98.d	2.01	0.069	0.1776	0.0049	5.63063	0.15535	0.0803	0.0022	1054	27	1209	56	1118	23	12.8205	557	329	860	2
	T14A_99.d	1.9	0.19	0.0939	0.0037	10.6496	0.419634	0.131	0.01	575	21	2010	140	1031	65	71.393	481	657	856	1
	T14A_100.d	2.58	0.28	0.205	0.023	4.87805	0.547293	0.0908	0.0093	1190	120	1370	210	1276	76	13.1387	15	7	22	2
	T14A_101.d	2.7	0.39	0.138	0.015	7.24638	0.78765	0.14	0.016	824	85	2070	210	1264	99	60.1932	10	6	20	2
	T14A_102.d	2.03	0.14	0.1411	0.0066	7.08717	0.331505	0.1024	0.0046	850	37	1658	84	1120	46	48.7334	304	26	81	13
	T14A_103.d	0.92	0.054	0.0998	0.0041	10.02	0.411645	0.0665	0.0019	613	24	814	61	658	28	24.6929	837	27	84	32
	T14A_104.d	0.911	0.031	0.1008	0.0027	9.92064	0.265731	0.0652	0.0019	619	16	775	62	657	17	20.129	492	222	382	2
	T14A_105.d	1.144	0.068	0.1031	0.0044	9.69932	0.413938	0.0792	0.0029	631	25	1167	75	765	30	45.9297	1204	672	1177	4
	T14A_106.d	4.83	0.17	0.3288	0.0091	3.04136	0.084174	0.1074	0.0028	1834	44	1752	48	1789	30	-4.68037	179	114	558	2
	T14A_107.d	0.974	0.038	0.0794	0.0021	12.5945	0.333103	0.0891	0.0032	493	13	1393	69	691	19	64.6088	862	1017	1010	1
	T14A_108.d	1.532	0.065	0.1547	0.0046	6.46412	0.192211	0.0717	0.0022	927	25	982	69	945	27	5.60081	277	21	53	20
	T14A_109.d	2.79	0.48	0.247	0.036	4.04858	0.590077	0.086	0.0096	1400	180	1290	230	1280	130	-8.52713	9	4	18	3
	T14A_110.d	2.077	0.071	0.1945	0.0053	5.14139	0.140099	0.0775	0.002	1145	28	1133	50	1141	24	-1.05914	384	230	627	2
	T14A_111.d	4.4	0.15	0.3008	0.0081	3.32447	0.0895219	0.1078	0.0027	1698	39	1767	48	1713	29	3.90492	876	58	447	16
	T14A_112.d	2.528	0.099	0.2218	0.0065	4.50857	0.132127	0.0845	0.0026	1291	34	1317	61	1280	30	1.97418	188	82	235	3
	T14A_113.d	1.014	0.043	0.1149	0.0036	8.70322	0.272686	0.0644	0.0021	701	20	753	72	714	21	6.90571	411	81	150	5
	T14A_114.d	0.909	0.039	0.1075	0.0033	9.30233	0.28556	0.0626	0.0023	658	19	685	75	657	20	3.94161	242	127	199	2
	T14A_115.d	2.64	0.21	0.163	0.011	6.13497	0.414016	0.1205	0.0089	968	61	1950	130	1323	60	50.359	58	40	98	2
	T14A_116.d	1.22	0.062	0.1289	0.0057	7.75795	0.343059	0.0705	0.0023	780	32	931	66	806	28	16.2191	592	92	139	8
	T14A_117.d	0.73	0.035	0.0891	0.0027	11.2233	0.340101	0.0603	0.003	552	16	608	96	555	20	9.21053	361	114	140	3
	T14A_118.d	1.6	0.07	0.1601	0.005	6.2461	0.195069	0.0723	0.0026	957	28	978	73	973	27	2.14724	210	91	200	2
	T14A_119.d	17.6	0.71	0.551	0.019	1.81488	0.0625821	0.234	0.0058	2823	77	3080	39	2965	40	8.34416	480	332	2181	2
	T14A_120.d	5.79	0.21	0.334	0.0095	2.99401	0.085159	0.1249	0.0031	1860	46	2031	44	1944	31	8.4195	568	50	220	13
	T14A_121.d	2.081	0.088	0.1794	0.0053	5.57414	0.164676	0.0836	0.0029	1063	29	1276	68	1145	29	16.6928	204	173	404	1
	T14A_122.d	2.55	0.15	0.1702	0.0087	5.87544	0.300331	0.1096	0.0041	1009	47	1785	66	1273	41	43.4734	370	145	309	2
	T14A_123.d	1.764	0.059	0.177	0.0044	5.64972	0.140445	0.0723	0.0019	1050	24	1001	52	1031	22	-4.8951	340	111	277	3
	T14A_124.d	3.03	0.32	0.133	0.01	7.5188	0.565323	0.164	0.014	799	57	2460	160	1371	79	67.5203	14	6	22	3
	T14A_125.d	1.747	0.07	0.1706	0.0056	5.86167	0.192411	0.0754	0.0022	1015	31	1075	61	1028	25	5.5814	281	49	103	6
	T14A_126.d	0.753	0.029	0.0879	0.0028	11.3766	0.362393	0.0623	0.0019	543	16	685	65	569	17	20.7299	417	192	240	2
	T14A_127.d	3.97	0.62	0.399	0.053	2.50627	0.332913	0.0734	0.006	2100	240	1040	160	1600	120	-101.923	10	4	26	7
	T14A_128.d	3.1	0.4	0.162	0.014	6.17284	0.533455	0.149	0.019	958	75	2050	210	1343	89	53.2683	20	5	13	4
	T14A_129.d	11.36	0.56	0.489	0.021	2.04499	0.0878217	0.1661	0.0049	2552	75	2516	47	2556	44	-1.43084	228	103	726	2
	T14A_130.d	2.64	0.1	0.2086	0.0066	4.79386	0.151675	0.0918	0.0029	1221	35	1465	64	1311	28	16.6553	363	134	418	3
	T14A_131.d	2.16	0.13	0.1053	0.0035	9.49668	0.315654	0.1484	0.007	647	20	2325	82	1165	40	72.172	698	248	983	3
	T14A_132.d	31.8	1.2	0.668	0.02	1.49701	0.0448205	0.3377	0.0087	3296	74	3654	38	3546	35	9.79748	605	52	294	12
	T14A_133.d	2.15	0.23	0.116	0.01	8.62069	0.743163	0.1313	0.0097	701	60	2090	120	1139	76	66.4593	72	44	65	2
	T14A_134.d	1.779	0.064	0.1707	0.0054	5.85823	0.185322	0.0756	0.0021	1015	29	1085	55	1039	24	6.45161	455	126	335	4
	T14A_135.d	2.154	0.081	0.1921	0.0056	5.20562	0.151752	0.0799	0.0026	1132	31	1193	62	1165	26	5.11316	274	194	592	1
	T14A_136.d	0.67	0.033	0.0829	0.0025	12.0627	0.363773	0.0591	0.0026	513	15	577	85	527	17	11.0919	760	320	384	2
	T14A_137.d	0.859	0.054	0.0831	0.0036	12.0337	0.521315	0.0736	0.0038	514	22	1050	110	625	29	51.0476	220	108	116	2
	T14A_138.d	0.931	0.079	0.104	0.0077	9.61538	0.711908	0.0627	0.0022	634	41	683	60	651	35	7.17423	916	323	437	3
	T14A_139.d	1.8	0.24	0.0839	0.0087	11.919	1.23593	0.17	0.027	516	51	2220	270	999	86	76.7568	10	3	7	4
	T14A_140.d	1.95	0.26	0.117	0.012	8.54701	0.876616	0.115	0.013	706	66	1770	230	1016	87	60.113	8	3	5	3
	T14A_141.d	7.62	0.65	0.265	0.026	3.77359	0.370239	0.199	0.013	1500	140	2810	120	2170	73	46.6192	58	19	83	3
	T14A_142.d	4.08	0.14	0.3009	0.0081	3.32336	0.0894624	0.0976	0.0027	1695	40	1574	52	1651	27	-7.68742	274	67	260	4
	T14A_143.d	4.82	0.2	0.304	0.01	3.28947	0.108206	0.1134	0.0028	1714	49	1853	45	1784	36	7.50135	340	155	741	2
	T14A_144.d	0.828	0.029	0.0973	0.0026	10.2775	0.27463	0.0607	0.0017	598	15	625	59	612	16	4.32	751	633	1007	1
	T14A_145.d	2.55	0.12	0.1778	0.0054	5.6243	0.170817	0.1041	0.0039	1055	30	1680	68	1280	35	37.2024	166	111	374	1
	T14A_146.d	2.237	0.082	0.2003	0.0054	4.99251	0.134596	0.0807	0.0024	1177	29	1205	59	1191	26	2.32365	168	464	1535	0
SW027	SW027_01.d	8.23	0.82	0.372	0.032	2.68817	0.231241	0.1688	0.009	2000	130	2557	92	2250	91	21.7833	63	87	44	1
	SW027_02.d	11.09	0.79	0.484	0.029	2.06612	0.123796	0.1664	0.0059	2540	140	2519	70	2530	110	-0.833664	326	428	2577	1
	SW027_03.d	0.63	0.12	0.079	0.01	12.6582	1.60231	0.0582	0.005	492	55	460	150	490	47	-6.95652	148	188	211	1
	SW027_04.d	0.485	0.083	0.0332	0.0027	30.1205	2.44956	0.1107	0.0081	210	17	1810	95	399	37	88.3978	1839	3681	813	1
	SW027_05.d	2.43	0.19	0.1769	0.0087	5.65291	0.278012	0.0989	0.0039	1052	48	1607	69	1248	53	34.5364	706	1028	1201	1
	SW027_06.d	0.761	0.08	0.0941	0.0051	10.627	0.575958	0.0591	0.0028	579	30	560	88	573	29	-3.39286	359	65	31	9
	SW027_07.d	6.36	0.47	0.287	0.018	3.48432	0.218529	0.1599	0.0058	1630	95	2451	70	2027	95	33.4965	861	645	1360	1
	SW027_08.d	0.63	0.13	0.0769	0.0078	13.0039	1.31899	0.058	0.011	477	46	460	270	482	71	-3.69565	39	57	28	1
	SW027_09.d	1.88	0.48	0.184	0.039	5.43478	1.15194	0.0744	0.0056	1090	180	1060	150	1080	100	-2.83019	352	176	462	2
	SW027_10.d	0.839	0.093	0.089	0.0075	11.236	0.94685	0.0713	0.0043	547	44	990	110	604	47	44.7475	276	494	382	1
	SW027_11.d	0.73	0.25	0.0491	0.0092	20.3666	3.81615	0.126	0.053	308	57	1390	610	510	130	77.8417	19	24	6	1
	SW027_12.d	0.542	0.057	0.0371	0.005	26.9542	3.63264	0.127	0.0068	233	31	2047	98	430	34	88.6175	1512	4692	797	0
	SW027_13.d	2.93	0.31	0.243	0.019	4.11523	0.321767	0.094	0.0067	1403	98	1490	120	1396	85	5.83893	127	80	188	2
	SW027_14.d	1.98	0.23	0.161	0.014	6.21118	0.540103	0.0902	0.0037	960	71	1434	81	1111	59	33.0544	669	757	967	1
	SW027_15.d	1.38	0.11	0.1442	0.0069	6.93481	0.331832	0.0697	0.0031	868	39	909	84	878	45	4.51045	132	405	865	0
	SW027_16.d	0.805	0.072	0.0714	0.0057	14.0056	1.11809	0.0816	0.0047	443	32	1260	110	594	39	64.8413	561	635	436	1
	SW027_17.d	0.612	0.049	0.0793	0.0041	12.6103	0.651985	0.0569	0.0026	492	24	450	100	485	31	-9.33333	248	172	207	2
	SW027_18.d	0.9	0.13	0.0857	0.0058	11.6686	0.789708	0.0771	0.0078	530	34	1020	210	639	66	48.0392	25	29	36	1
	SW027_19.d	9.01	0.63	0.425	0.025	2.35294	0.138408	0.1565	0.0066	2250	130	2421	70	2358	97	7.0632	11	33	58	0
	SW027_20.d	0.94	0.18	0.0759	0.0065	13.1752	1.12831	0.0842	0.0083	471	35	1210	180	650	79	61.0744	279	144	148	2
	SW027_21.d	0.95	0.12	0.109	0.011	9.17431	0.925848	0.0622	0.0045	667	60	660	140	684	56	-1.06061	254	91	117	3
	SW027_22.d	0.857	0.084	0.0677	0.0053	14.7711	1.15637	0.0934	0.004	421	32	1499	83	615	44	71.9146	786	607	300	1
	SW027_23.d	0.794	0.073	0.0733	0.004	13.6426	0.744478	0.0777	0.0054	456	24	1050	130	575	37	56.5714	453	320	365	1
	SW027_24.d	0.613	0.049	0.0737	0.0034	13.5685	0.625956	0.0595	0.0028	458	21	569	87	485	29	19.5079	462	285	341	2
	SW027_25.d	0.697	0.094	0.0754	0.0053	13.2626	0.932252	0.0663	0.0066	468	31	800	160	536	44	41.5	621	394	303	2
	SW027_26.d	0.74	0.059	0.0734	0.0043	13.624	0.798135	0.0752	0.0042	456	26	1080	100	561	33	57.7778	393	392	255	1
	SW027_27.d	0.597	0.044	0.0751	0.0037	13.3156	0.656027	0.0572	0.0026	467	22	473	94	476	28	1.2685	373	255	297	2
	SW027_28.d	0.97	0.18	0.0717	0.0068	13.947	1.32273	0.107	0.025	444	42	1620	340	622	85	72.5926	228	325	188	1
	SW027_29.d	0.63	0.13	0.0777	0.0044	12.87	0.728804	0.0574	0.0074	482	26	520	150	493	54	7.30769	336	237	252	1
	SW027_30.d	0.848	0.069	0.0689	0.0037	14.5138	0.779405	0.0898	0.005	430	23	1330	120	610	37	67.6692	685	670	663	1
	SW027_31.d	3.39	0.32	0.248	0.017	4.03226	0.276405	0.0996	0.0043	1424	80	1614	76	1506	66	11.772	266	169	315	2
	SW027_32.d	25.2	2	0.674	0.046	1.48368	0.10126	0.268	0.01	3310	200	3300	58	3300	130	-0.30303	135	108	979	1
ACH7-8	ACH7-8-01	3.98	0.14	0.2291	0.0086	4.36491	0.163851	0.1249	0.002	1332	47	2031	28	1627	32	34.4165	625	424	1555	2
	ACH7-8-02	4.38	0.21	0.248	0.013	4.03226	0.211368	0.1264	0.0033	1425	70	2049	41	1701	57	30.4539	723	505	1754	2
	ACH7-8-03	3.334	0.097	0.2501	0.0079	3.9984	0.126299	0.0955	0.0019	1440	41	1536	37	1487	22	6.25	163	108	395	2
	ACH7-8-04	0.544	0.019	0.0677	0.0021	14.7711	0.458186	0.0573	0.0016	423	13	456	58	439	12	7.23684	217	244	263	1
	ACH7-8-05	0.614	0.02	0.0696	0.0022	14.3678	0.454155	0.0632	0.0014	434	13	711	44	485	12	38.9592	717	473	582	2
	ACH7-8-06	0.657	0.02	0.0817	0.0026	12.2399	0.38952	0.0573	0.0013	507	16	493	50	512	12	-2.83976	303	268	366	1
	ACH7-8-07	0.582	0.019	0.0728	0.0023	13.7363	0.433975	0.0574	0.0014	453	14	502	52	466	12	9.76096	461	382	427	1
	ACH7-8-08	1.004	0.033	0.1113	0.0035	8.98473	0.282539	0.0642	0.0017	680	20	737	54	704	17	7.73406	258	294	503	1
	ACH7-8-09	8.69	0.25	0.419	0.014	2.38664	0.0797444	0.1494	0.0024	2254	63	2338	27	2312	24	3.59281	713	474	2899	2
	ACH7-8-10	4.3	0.35	0.262	0.016	3.81679	0.233087	0.1115	0.0032	1489	79	1803	49	1625	51	17.4154	465	178	680	3
	ACH7-8-11	0.683	0.033	0.0847	0.003	11.8064	0.418171	0.0573	0.0025	524	18	504	99	530	19	-3.96825	144	254	334	1
